# Supplementary material for: Species Discrimination within the Metarhizium PARB Clade: Ribosomal Intergenic Spacer (rIGS)-Based Diagnostic PCR and Single Marker Taxonomy
Source: MDPI journal article supplement (doi:10.3390/jof9100996), 2023-10-08
Supplement: s1 [file s1]

|                                         |             |            |            |            |            |            |            |            |            |            |     |
|-----------------------------------------|-------------|------------|------------|------------|------------|------------|------------|------------|------------|------------|-----|
| mani-IDF1                               | -----       | -----      | -----      | -----      | -----      | -----      | -----      | -----      | -----      | -----      | 100 |
| mani-IDR1                               | -----       | -----      | -----      | -----      | -----      | -----      | -----      | -----      | -----      | -----      | 100 |
| Metarhizium_anisopliae_TYPE_ARSEF_7487  | GCGGGGCGGG  | TGTTGGGGTT | AAAGCCACCA | A-GTA-GTGG | TTACAGGCTT | GAGGGGAG-- | CTGCCGAG-- | -TGGT-GGTT | CTAGAGGGAA | AAGTCTGCCA | 100 |
| Metarhizium_anisopliae_ARSEF_1080       | GCGGGGCGGG  | TGTTGGGGTT | AGAGCCACCA | A-GTA-GTGG | TTACAGGCTT | GAGGAGAG-- | CTGCCGAG-- | -TGGT-GGTT | CTAGAGGGAA | AAGTCTGCCA | 100 |
| Metarhizium_anisopliae_ARSEF_6347       | GCGGGGCGGG  | TGTTGGGGTT | AGAGCCACCA | A-GTA-GTGG | TTACAGGCTT | GAGGAGAG-- | CTGCCGAG-- | -TGGT-GGTT | CTAGAGGGAA | AAGTCTGCCA | 100 |
| Metarhizium_anisopliae_ARSEF_7450       | GCGGGGCGGG  | TGTTGGGGTT | AAAGCCACCA | A-GTA-GTGG | TTACAGGCTT | GAGGGGAG-- | CTGCCGAG-- | -TGGT-GGTT | CTAGAGGGAA | AAGTCTGCCA | 100 |
| Metarhizium_anisopliae_ARSEF_798        | GCGGGGCGGG  | TGTTGGGGTT | AGAGCCACCA | A-GTA-GTGG | TTACAGGCTT | GAGGAGAG-- | CTGCCGAG-- | -TGGT-GGTT | CTAGAGGGAA | AAGTCTGCCA | 100 |
| Metarhizium_anisopliae_ART_2062         | GCGGGGCGGG  | TGTTGGGGTT | AAAGCCACCA | A-GTA-GTGG | TTACAGGCTT | GAGGGGAG-- | CTGCCGAG-- | -TGGT-GGTT | CTAGAGGGAA | AAGTCTGCCA | 100 |
|                                         |             |            |            |            |            |            |            |            |            |            |     |
| mbru-IDF1                               | -----       | -----      | -----      | -----      | -----      | -----      | -----      | -----      | -----      | -----      | 100 |
| mbru-IDR1                               | -----       | -----      | -----      | -----      | -----      | -----      | -----      | -----      | -----      | -----      | 100 |
| Metarhizium_brunneum_TYPE_ARSEF_2107    | GCGGGGCGGG  | TGTTGGGGTT | AGAGCCACCG | A-GTA-GTGG | CCGCAGGCTG | GAGGAGAG-- | CCGCCGAG-- | -TGGT-GGTT | C-AGGAGGGA | AAATCTGCCA | 100 |
| Metarhizium_brunneum_ARSEF_1066         | GCGGGGCGGG  | TGTTGGGGTT | AGAGCCACCG | A-GTA-GTGG | CCGCAGGCTT | GAGGAGAG-- | CCGCCGAG-- | -TGGT-GGTT | C-AGGAGGGA | AAATCTGCCA | 100 |
| Metarhizium_brunneum_ARSEF_1278         | GCGGGGCGGG  | TGTTGGGGTT | AGAGCCACCG | A-GTA-GTGG | CCGCAGGCTT | GAGGAGAG-- | CCGCCGAG-- | -TGGT-GGTT | C-AGGAGGGA | AAATCTGCCA | 100 |
| Metarhizium_brunneum_ARSEF_3295         | GCGGGGCGGG  | TGTTGGGGTT | AGAGCCACCG | A-GTA-GTGG | CCGCAGGCTT | GAGGAGAG-- | CCGCCGAG-- | -TGGT-GGTT | C-GGGAGGGA | AAATCTGCCA | 100 |
| Metarhizium_brunneum_ARSEF_3826         | GCGGGGCGGG  | TGTTGGGGTT | AGAGCCACCG | A-GTA-GTGG | CCGCAGGCTT | GAGGAGAG-- | CCGCCGAG-- | -TGGT-GGTT | C-AGGAGGGA | AAATCTGCCA | 100 |
| Metarhizium_brunneum_ARSEF_4152         | GCGGGGCGGG  | TGTTGGGGTT | AGAGCCACCG | A-GTA-GTGG | CCGCAGGCTT | GAGGAGAG-- | CCGCCGAG-- | -TGGT-GGTT | C-GGGAGGGA | AAATCTGCCA | 100 |
| Metarhizium_brunneum_ARSEF_4179         | GCGGGGCGGG  | TGTTGGGGTT | AGAGCCACCG | A-GTA-GTGG | CCGCAGGCTT | GAGGAGAG-- | CCGCCGAG-- | -TGGT-GGTT | C-GGGAGGGA | AAATCTGCCA | 100 |
| Metarhizium_brunneum_ARSEF_5198         | GCGGGGCGGG  | TGTTGGGGTT | AGAGCCACCG | A-GTA-GTGG | CCGCAGGCTT | GAGGAGAG-- | CCGCCGAG-- | -TGGT-GGTT | C-AGGAGGGA | AAATCTGCCA | 100 |
| Metarhizium_brunneum_ARSEF_7524         | GCGGGGCGGG  | TGTTGGGGTT | AGAGCCACCG | A-GTA-GTGG | CCGCAGGCTT | GAGGAGAG-- | CCGCCGAG-- | -TGGT-GGTT | C-AGGAGGGA | AAATCTGCCA | 100 |
| Metarhizium_brunneum_ARSEF_988          | GCGGGGCGGG  | TGTTGGGGTC | AGAGCCACCG | A-GTA-GTGG | CCGCAGGCTT | GAGGAGAG-- | CCGCCGAG-- | -TGGT-GGTT | C-GGGAGGGA | AAATCTGCCA | 100 |
| Metarhizium_brunneum_ART_2825           | GCGGGGCGGG  | TGTTGGGGTT | AGAGCCACCG | A-GTA-GTGG | CCGCAGGCTT | GAGGAGAG-- | CCGCCGAG-- | -TGGT-GGTT | C-GGGGGGGG | AAATCTGCCA | 100 |
|                                         |             |            |            |            |            |            |            |            |            |            |     |
| mpin-IDF1                               | -----       | -----      | -----      | -----      | -----      | -----      | -----      | -----      | -----      | -----      | 100 |
| mpin-IDR1                               | -----       | -----      | -----      | -----      | -----      | -----      | -----      | -----      | -----      | -----      | 100 |
| Metarhizium_pingshaense_TYPE_CBS_257.90 | GCGGGGCGGG  | TGTTGGGGTT | AAAGCCACCA | AAGTA-GTGG | TTGCAGGCTT | GAGGAGAG-- | CCGCCGAGCG | GTGGTTGGTT | CTAGAGGGGA | AAATCTGCCA | 100 |
| Metarhizium_pingshaense_ARSEF_2809      | GCGGGGCGGG  | TGTTGGGGTT | AAAGCCACCG | A-GTA-GTGG | TTGCAGGCTT | GAGGAGAGAG | CTGCCGAGCG | GT----GGTT | CTAGAGGGGA | AAATCTGCCA | 100 |
| Metarhizium_pingshaense_ARSEF_3210      | GCGGGGCGGG  | TGTTGGGGTT | AAAGCCGCCA | AAGTA-GTGG | TTGCAGGCTT | GAGGAGAG-- | CCGCCGAGCG | GTGGTTGGTT | CTAGAGGGGA | AAATCTGCCA | 100 |
| Metarhizium_pingshaense_ARSEF_4342      | GCGGGGCGGG  | TGTTGGGGTT | AAAGCCACCA | A-GTA-GTGG | TTGCAGGCTT | GAGGAGAG-- | CCGCCGAG-- | -TGGT-GGTT | CTAGAGGGAA | AAATCTGCCA | 100 |
| Metarhizium_pingshaense_ARSEF_7422      | GCGGGGCGGG  | TGTTGGGGTT | AAAGCCACCA | A-GTAAGTGG | CTGCAGGCTT | GAGGAGAG-- | CCGCCGGGCG | G----TGGTT | CTAGAGGGGA | AAATCTGCCA | 100 |
| Metarhizium_pingshaense_ARSEF_7929      | GCGGGGCGGG  | TGTTGGGGTT | AAAGCCGCCA | AAGTA-GTGG | TTGCAGGCTT | GAGGAGAG-- | CCGCCGAGCG | GTGGTTGGTT | CTAGAGGGGA | AAATCTGCCA | 100 |
|                                         |             |            |            |            |            |            |            |            |            |            |     |
| mrob-IDF1                               | -----GCGGGG | TGTTGGGGTT | AAT-----   | -----      | -----      | -----      | -----      | -----      | -----      | -----      | 100 |
| mrob-IDR1                               | -----       | -----      | -----      | -----      | -----      | -----      | -----      | -----      | -----      | -----      | 100 |
| Metarhizium_robertsii_TYPE_ARSEF_2575   | GCGGGGCGGG  | TGTTGGGGTT | AATGCCACCA | A-GTA-GTGG | TTGCAGGCTT | GAGGAGAG-- | CCGCCGAG-- | -TGGT-GGTT | CTAGAGGGAA | AAATCTGCCA | 100 |
| Metarhizium_robertsii_ARSEF_6472        | GCGGGGCGGG  | TGTTGGGGTT | AATGCCACCA | A-GTA-GTGG | TTGCAGGCTT | GAGGAGAG-- | CCGCCGAG-- | -TGGT-GGTT | CTAGAGGGAA | AAATCTGCCA | 100 |
| Metarhizium_robertsii_ARSEF_727         | GCGGGGCGGG  | TGTTGGGGTT | AATGCCACCA | A-GTA-GTGG | TTGCAGGCTT | GAGGAGAG-- | CCGCCGAG-- | -TGGT-GGTT | CTAGAGGGAA | AAATCTGCCA | 100 |
| Metarhizium_robertsii_ARSEF_7501        | GCGGGGCGGG  | TGTTGGGGTT | AATGCCACCA | A-GTA-GTGG | TTGCAGGCTT | GAGGAGAG-- | CCGCCGAG-- | -TGGT-GGTT | CTAGAGGGAA | AAATCTGCCA | 100 |
| Metarhizium_robertsii_ARSEF_7532        | GCGGGGCGGG  | TGTTGGGGTT | AATGCCACCA | A-GTA-GTGG | TTGCAGGCTT | GAGGAGAG-- | CCGCCGAG-- | -TGGT-GGTT | CTAGAGGGAA | AAATCTGCCA | 100 |
| Metarhizium_robertsii_ARSEF_8070        | GCGGGGCGGG  | TGTTGGGGTT | AATGCCACCA | A-GTA-GTGG | TTGCAGGCTT | GAGGAGAG-- | CCGCCGAG-- | -TGGT-GGTT | CTAGAGGGAA | AAATCTGCCA | 100 |
| Metarhizium_robertsii_ARSEF_8685        | GCGGGGCTGG  | TGTTGGGGTT | AATGCCACCA | A-GTA-GTGG | TTGCAGGCTT | GAGGAGAG-- | CCGCCGAG-- | -TGGT-GGTT | CTAGAGGGAA | AAATCTGCCA | 100 |

|                                         |            |            |            |            |            |            |            |            |            |            |     |
|-----------------------------------------|------------|------------|------------|------------|------------|------------|------------|------------|------------|------------|-----|
| mani-IDF1                               | -----      | -----      | -----      | -----      | -----      | -----      | -----      | -----      | -----      | -----      | 200 |
| mani-IDR1                               | -----      | -----      | -----      | -----      | -----      | -----      | -----      | -----      | -----      | -----      | 200 |
| Metarhizium_anisopliae_TYPE_ARSEF_7487  | AGTTC--AAA | GGTCCAGGCA | AGCGAAAAG- | TTTACCAAGT | CGGAAGGTTG | GGCGAGTAAA | AAAAT-TACC | AAGTCCAAAA | TATTGGCGGT | AACCTACCCG | 200 |
| Metarhizium_anisopliae_ARSEF_1080       | GGTTC--AAA | GGTCCAGGCA | AGCGAAAAG- | TTTACCAAGT | CGGAAGGTTG | GGCGAGTAAA | AAAAT-TACC | AAGTCCAAAA | TATTGGCGGT | AACCTACCCG | 200 |
| Metarhizium_anisopliae_ARSEF_6347       | GGTTC--AAA | GGTCCAGGCA | AGCGAAAAG- | TTTACCAAGT | CGGAAGGTTG | GGCGAGTAAA | AAAAT-TACC | AAGTCCAAAA | TATTGGCGGT | AACCTACCCG | 200 |
| Metarhizium_anisopliae_ARSEF_7450       | AGTTC--AAA | GGTCCAGGCA | AGCGAAAAG- | TTTACCAAGT | CGGAAGGTTG | GGCGAGTAAA | AAAAT-TACC | AAGTCCAAAA | TATTGGCGGT | AACCTACCCG | 200 |
| Metarhizium_anisopliae_ARSEF_798        | GGTTC--AAA | GGTCCAGGCA | AGCGAAAAG- | TTTACCAAGT | CGGAAGGTTG | GGCGAGTAAA | AAAAT-TACC | AAGTCCAAAA | TATTGGCGGT | AACCTACCCG | 200 |
| Metarhizium_anisopliae_ART_2062         | AGTTC--AAA | GGTCCAGGCA | AGCGAAAAG- | TTTACCAAGT | CGGAAGGTTG | GGCGAGTAAA | AAAAT-TACC | AAGTCCAAAA | TATTGGCGGT | AACCTACCCG | 200 |
| mbru-IDF1                               | -----      | -----      | -----      | -----      | -----      | -----      | -----      | -----      | -----      | -----      | 200 |
| mbru-IDR1                               | -----      | -----      | -----      | -----      | -----      | -----      | -----      | -----      | -----      | -----      | 200 |
| Metarhizium_brunneum_TYPE_ARSEF_2107    | AGCTC--AAA | GGTC-AGGCA | AGCGAGAGG- | TTTACCGAGT | CGGAAAGTCG | GGCGAGTAAA | AAGATATACC | AAGTCCAAAA | TACTGCCGGC | AACATACCCG | 200 |
| Metarhizium_brunneum_ARSEF_1066         | AGCTCTCAAA | GGTC-AGGCA | AGCGAGAGG- | TTTACCGAGT | CGGAAAGTCG | GGCGAGTAAA | AAGATATACC | AAGTCCAAAA | TACTGCCGGC | AACATACCCG | 200 |
| Metarhizium_brunneum_ARSEF_1278         | AGCTC--AAA | GGTC-AGGCA | AGCGAGAGGT | TTTACCGAGT | CGGAAAGTCG | GGCGAGTAAA | AAGATATACC | AAGTCCAAAA | TACTGCCGGC | AACATACCCG | 200 |
| Metarhizium_brunneum_ARSEF_3295         | AGCTC--AAA | GGTC-AGGCA | AGCGAGAGG- | TTTACCGGTT | CGGAAAGTCG | GGCGAGTAAA | AAGATATACC | AAGTCCAAAA | CACTGCCGGC | AACATACCCG | 200 |
| Metarhizium_brunneum_ARSEF_3826         | AGCTC--AAA | GGTC-AGGCA | AGCGAGAGG- | TTTACCGAGT | CGGAAAGTCG | GGCGAGTAAA | AAGATATACC | AAGTCCAAAA | TACTGCCGGC | AACATACCCG | 200 |
| Metarhizium_brunneum_ARSEF_4152         | AGCTC--AAA | GGTC-AGGCA | AGCGAGAGG- | TTTACCGGTT | CGGAAAGTCG | GGCGAGTAAA | AAGATATACC | AAGTCCAAAA | TACTGCCGGC | AACATACCCG | 200 |
| Metarhizium_brunneum_ARSEF_4179         | AGCTC--AAA | GGTC-AGGCA | AGCGAGAGG- | TTTACCGGTT | CGGAAAGTCG | GGCGAGTAAA | AAGATATACC | AAGTCCAAAA | TACTGCCGGC | AACATACCCG | 200 |
| Metarhizium_brunneum_ARSEF_5198         | AGCTCTCAAA | GGTC-AGGCA | AGCGAGAGG- | TTTACCGAGT | CGGAAAGTCG | GGCGAGTAAA | AAGATATACC | AAGTCCAAAA | TACTGCCGGC | AACATACCCG | 200 |
| Metarhizium_brunneum_ARSEF_7524         | AGCTCTCAAA | GGTC-AGGCA | AGCGAGAGG- | TTTACCGAGT | CGGAAAGTCG | GGCGAGTAAA | AAGATATACC | AAGTCCAAAA | TACTGCCGGC | AACATACCCG | 200 |
| Metarhizium_brunneum_ARSEF_988          | AGCTC--AAA | GGTC-AGGCA | AGCGAGAGG- | TTTACCGGTT | CGGAAAGTCG | GGCGAGTAAA | AAGATATACC | AAGTCCAAAA | CACTGCCGGC | AACATACCCG | 200 |
| Metarhizium_brunneum_ART_2825           | AGCTC--AAA | GGTC-AGGCA | AGCGAGAGG- | TTTACCGAGT | CGGAAAGTCG | GGCGAGTAAA | AAGATATACC | AAGTCCAAAA | TACTGCCGGC | AACATATCCG | 200 |
| mpin-IDF1                               | -----      | -----      | -----      | -----      | -----      | -----      | -----      | -----      | -----      | -----      | 200 |
| mpin-IDR1                               | -----      | -----      | -----      | -----      | -----      | -----      | -----      | -----      | -----      | -----      | 200 |
| Metarhizium_pingshaense_TYPE_CBS_257.90 | AGTTC--AAA | GGTC-AGGCA | AGCGAAAGG- | TTTACCGAGT | CGGAAGGTTG | GGCGAGTAAA | AAATT-TACC | AAGTCCAAAA | TACTGCCGGC | AACATACCCG | 200 |
| Metarhizium_pingshaense_ARSEF_2809      | AGTTC--AAA | GGTC-AGGCA | AGCGAAAGGT | TGTACCGAGT | CGGAAGGTTG | GGCGAGTAAA | GAATT-TACC | AAGTCCAAAA | TACTGCCGGC | AACATACCCG | 200 |
| Metarhizium_pingshaense_ARSEF_3210      | AGTTC--AAA | GGTC-AGGCA | AGCGAAAGG- | TTTACCGAGT | CGGAAGGTTG | GGCGAGTAAA | AAATT-TACC | AAGTCCAAAA | TACTGCCGGC | AACATACCCG | 200 |
| Metarhizium_pingshaense_ARSEF_4342      | AGTCC--AAA | GGTC-AGGCA | AGCGAAAGG- | TTCACCGAGT | CGGAAAGTCG | GGCGAGTAAA | AAATT-TACC | AAGTCCAAAA | TACTGCCGGC | AACATACCCG | 200 |
| Metarhizium_pingshaense_ARSEF_7422      | AGTTC--AAA | GGTC-AGGCA | AGCGAAAGG- | TTTACCGAGT | CGGAAGGTTG | GGCGAGTAAA | AAATT-TACC | AAGTCCAAAA | TACTGCCGGC | AACATACCCG | 200 |
| Metarhizium_pingshaense_ARSEF_7929      | AGTTC--AAA | GGTC-AGGCA | AGCGAAAGG- | TTTACCGAGT | CGGAAGGTTG | GGCGAGTAAA | AAATT-TACC | AAGTCCAAAA | TACTGCCGGC | AACATACCCG | 200 |
| mrob-IDF1                               | -----      | -----      | -----      | -----      | -----      | -----      | -----      | -----      | -----      | -----      | 200 |
| mrob-IDR1                               | -----      | -----      | -----      | -----      | -----      | -----      | -----      | -----      | -----      | -----      | 200 |
| Metarhizium_robertsii_TYPE_ARSEF_2575   | AGTTC--AAA | GGTC-AGGCA | AGCGAAAGG- | TTTACCGAGT | CGGAAGGTTG | GGCGAGTAAA | AAAAT-TACC | AAGTCCAAAA | TACTGGCGGT | AACCTACCCG | 200 |
| Metarhizium_robertsii_ARSEF_6472        | AGTTC--AAA | GGTC-AGGCA | AGCGAAAGG- | TTTACCGAGT | CGGAAGGTTG | GGCGAGTAAA | AAAAT-TACC | AAGTCCAAAA | TACTGGCGGT | AACCTACCCG | 200 |
| Metarhizium_robertsii_ARSEF_727         | AGTTC--AAA | GGTC-AGGCA | AGCGAAAGG- | TTTACCGAGT | CGGAAGGTTG | GGCGAGTAAA | AAAAT-TACC | AAGTCCAAAA | TACTGGCGGT | AACCTACCCG | 200 |
| Metarhizium_robertsii_ARSEF_7501        | AGTTC--AAA | GGTC-AGGCA | AGCGAAAGG- | TTTACCGAGT | CGGAAGGTTG | GGCGAGTAAA | AAAAT-TACC | AAGTCCAAAA | TACTGGCGGT | AACCTACCCG | 200 |
| Metarhizium_robertsii_ARSEF_7532        | AGTTC--AAA | GGTC-AGGCA | AGCGAAAGG- | TTTACCGAGT | CGGAAGGTTG | GGCGAGTAAA | AAAAT-TACC | AAGTCCAAAA | TACTGGCGGT | AACCTACCCG | 200 |
| Metarhizium_robertsii_ARSEF_8070        | AGTTC--AAA | GGTC-AGGCA | AGCGAAAGG- | TTTACCGAGT | CGGAAGGTTG | GGCGAGTAAA | AAAAT-TACC | AAGTCCAAAA | TACTGGCGGT | AACCTACCCG | 200 |
| Metarhizium_robertsii_ARSEF_8685        | AGTTC--AAA | GGTC-AGGCA | AGCGAAAGG- | TTTACCGAGT | CGGAAGGTTG | GGCGAGTAAA | AAAAT-TACC | AAGTCCAAAA | TACTGGCGGT | AACCTACCCG | 200 |



|                                         |            |            |            |            |            |            |            |            |                           |            |     |
|-----------------------------------------|------------|------------|------------|------------|------------|------------|------------|------------|---------------------------|------------|-----|
| mani-IDF1                               | -----      | -----      | -----      | -----      | -----      | -----      | -----      | -----      | GGCT ATAGTYAACT TTTGGACTT | 400        |     |
| mani-IDR1                               | -----      | -----      | -----      | -----      | -----      | -----      | -----      | -----      | -----                     | 400        |     |
| Metarhizium anisopliae_TYPE_ARSEF_7487  | TATTTTTGGA | CTTT-GTAGA | TTTACTTGAA | TCAATTCACG | GGAAGTTACC | TGCCGAATTA | CCTGGGCTCC | CGGGTAGGCT | ATAGTTAACT                | TTTGGACTT- | 400 |
| Metarhizium anisopliae_ARSEF_1080       | TATTTTTGGA | CTTT-GTAGA | TTTACTTGAA | TCAATTCACG | GGAAGTTACC | TGCCGAATTA | CCTGGGCTCC | CGGGTAGGCT | ATAGTCAACT                | TTTGGACTT- | 400 |
| Metarhizium anisopliae_ARSEF_6347       | TATTTTTGGA | CTTT-GTAGA | TTTACTTGAA | TCAATTCACG | GGAAGTTACC | TGCCGAATTA | CCTGGGCTCC | CGGGTAGGCT | ATAGTCAACT                | TTTGGACTT- | 400 |
| Metarhizium anisopliae_ARSEF_7450       | TATTTTTGGA | CTTT-GTAGA | TTTACTTGAA | TCAATTCACG | GGAAGTTACC | TGCCGAATTA | CCTGGGCTCC | CGGGTAGGCT | ATAGTTAACT                | TTTGGACTT- | 400 |
| Metarhizium anisopliae_ARSEF_798        | TATTTTTGGA | CTTT-GTAGA | TTTACTTGAA | TCAATTCACG | GGAAGTTACC | TGCCGAATTA | CCTGGGCTCC | CGGGTAGGCT | ATAGTCAACT                | TTTGGACTT- | 400 |
| Metarhizium anisopliae_ART_2062         | TATTTTTGGA | CTTT-GTAGA | TTTACTTGAA | TCAATTCACG | GGAAGTTACC | TGCCGAATTA | CCTGGGCTCC | CGGGTAGGCT | ATAGTTAACT                | TTTGGACTT- | 400 |
| mbru-IDF1                               | -----      | -----      | -----      | -----      | -----      | -----      | -----      | -----      | -----TGACT TKTGCACWYG     | 400        |     |
| mbru-IDR1                               | -----      | -----      | -----      | -----      | -----      | -----      | -----      | -----      | -----                     | 400        |     |
| Metarhizium brunneum_TYPE_ARSEF_2107    | AATTTTTGGA | CTTTTGCGGA | TTTACTTGAA | TCAATTCACA | GGAAGTTACC | TGCCAAATTG | CCTGGGCTCC | CGGGTAGGCT | ATAGTTGACT                | TTTGGACTTG | 400 |
| Metarhizium brunneum_ARSEF_1066         | AATTTTTGGA | CTTT-GCGGA | TTTACTTGAA | TCAATTCACA | GGAAGTTACC | TGCCAAATTG | CCTGGGCTCC | CGGGTAGGCT | ATAGTTGACT                | TTTGGACTTG | 400 |
| Metarhizium brunneum_ARSEF_1278         | AATTTTTGGA | CTTT-GCGGA | TTTACTTGAA | TCAATTCACA | GGAGGTTACC | TGCCAAATTG | CCTGGGCTCC | CGGGTAGGCT | ATAGTTGACT                | TTTGGACACG | 400 |
| Metarhizium brunneum_ARSEF_3295         | AATTTTTGGA | CTTT-GCGGG | TTCACTCGAA | TCAATTCACA | GGAAGTTACC | TGCCAAATTG | CCTGGGCTCC | CGGGTAGGCT | ATAGTTGACT                | TTTGGACTTG | 400 |
| Metarhizium brunneum_ARSEF_3826         | AATTTTTGGA | CTTT-GCGGA | TTTACTTGAA | TCAATTCACA | GGAAGTTACC | TGCCAAATTG | CCTGGGCTCC | CGGGTAGGCT | ATAGTTGACT                | TTTGGACTTG | 400 |
| Metarhizium brunneum_ARSEF_4152         | AATTTTTGGA | CTTG-GCGGA | TTTACTTGAA | TCAATCCACA | GGAAGTTACC | TGCCGAATTA | CCTGGGCTCC | CGGGTAGGCC | ATAGTTGACT                | TGTGGACTTG | 400 |
| Metarhizium brunneum_ARSEF_4179         | AATTTTTGGA | CTTG-GCGGA | TTTACTTGAA | TCAATCCACA | GGAAGTTACC | TGCCGAATTA | CCTGGGCTCC | CGGGTAGGCC | ATAGTTGACT                | TGTGGACTTG | 400 |
| Metarhizium brunneum_ARSEF_5198         | AATTTTTGGA | CTTT-GCGGA | TTTACTTGAA | TCAATTCACA | GGAAGTTACC | TGCCAAATTG | CCTGGGCTCC | CGGGTAGGCT | ATAGTTGACT                | TTTGGACTTG | 400 |
| Metarhizium brunneum_ARSEF_7524         | AATTTTTGGA | CTTT-GCGGA | TTTACTTGAA | TCAATTCACA | GGAAGTTACC | TGCCAAATTG | CCTGGGCTCC | CGGGTAGGCT | ATAGTTGACT                | TTTGGACTTG | 400 |
| Metarhizium brunneum_ARSEF_988          | AATTTTTGGA | CTTT-GCGGA | TTCACTCGAA | TCAATTCACA | GGAAGTTACC | TGCCAAATTG | CCTGGGCTCC | CGGGTAGGCT | ATAGTTGACT                | TTTGGACTTG | 400 |
| Metarhizium brunneum_ART_2825           | AATTTTTGGA | CTTT-GCGGA | TTTACTTGAA | TCAATTCACA | GGAAGTTACC | TGCCAAATTG | CCTGGGCTCC | CGGGTAGGCT | ATAGTTGACT                | TTTGGACTTG | 400 |
| mpin-IDF1                               | -----      | -----      | -----      | -----      | -----      | -----      | -----      | -----      | -----                     | -----      | 400 |
| mpin-IDR1                               | -----      | -----      | -----      | -----      | -----      | -----      | -----      | -----      | -----                     | -----      | 400 |
| Metarhizium pingshaense_TYPE_CBS_257.90 | TATTTTTGGA | CTTT-GTAGA | TTTGCTTGAA | TCAATTTACA | GGAAGTTGCC | TGCCGAATTA | CCTGGGCTCC | CGGGTAGGCT | ATAGTTAACT                | TTTGGACTT- | 400 |
| Metarhizium pingshaense_ARSEF_2809      | TATTTTTGGA | CTTT-GTAGA | TTTGCTTGAA | TCAATTTACA | GGAAGTTGCC | TGCCGAATTA | CCTGGGCTCC | CGGGTAGGCT | ATAGTTAACT                | TTTGGACTT- | 400 |
| Metarhizium pingshaense_ARSEF_3210      | TATTTTTGGA | CTTT-GTAGA | TTTGCTTGAA | TCAATTTACA | GGAAGTTGCC | TGCCGAATTA | CCTGGGCTCC | CGGGTAGGCT | ATAGTTAACT                | TTTGGACTT- | 400 |
| Metarhizium pingshaense_ARSEF_4342      | AATTTTTGGA | CTTT-GTAGA | TTTACTTGAA | TCAATTCACA | AGAAGTTACC | TGCCGAATTA | CCTGGGCTCC | CGGGTAGGCT | ATAGTCAACT                | TTTGGACTT- | 400 |
| Metarhizium pingshaense_ARSEF_7422      | TATTTTTGGA | CTTT-GTAGA | TTTACTTAAA | TCAATTTACA | GCAAGTTGCC | TGCCGAATTA | CCTGGGCTCC | CGGGTAGGCT | ATAGT-AACT                | TTTGGACTT- | 400 |
| Metarhizium pingshaense_ARSEF_7929      | TATTTTTGGA | CTTT-GTAGA | TTTGCTTGAA | TCAATTTACA | GGAAGTTGCC | TGCCGAATTA | CCTGGGCTCC | CGGGTAGGCT | ATAGTTAACT                | TTTGGACTT- | 400 |
| mrob-IDF1                               | -----      | -----      | -----      | -----      | -----      | -----      | -----      | -----      | -----                     | -----      | 400 |
| mrob-IDR1                               | -----      | -----      | -----      | -----      | -----      | -----      | -----      | -----      | -----                     | -----      | 400 |
| Metarhizium robertsii_TYPE_ARSEF_2575   | TATTTTTGGA | CTTT-GTAGA | TTTACTTAAA | TCAATTCACA | GGAAGTTACC | TGCCGAATTA | CCTGGGCTCC | CGGGTAGGCT | ATAGTTAACT                | TTTGGACTT- | 400 |
| Metarhizium robertsii_ARSEF_6472        | TATTTTTGGA | CTTT-GTAGA | TTTACTTAAA | TCAATTCACA | GGAAGTTACC | TGCCGAATTA | CCTGGGCTCC | CGGGTAGGCT | ATAGTTAACT                | TTTGGACTT- | 400 |
| Metarhizium robertsii_ARSEF_727         | TATTTTTGGA | CTTT-GTAGA | TTTACTTAAA | TCAATTCACA | GGAAGTTACC | TGCCGAATTA | CCTGGGCTCC | CGGGTAGGCT | ATAGTTAACT                | TTTGGACTT- | 400 |
| Metarhizium robertsii_ARSEF_7501        | TATTTTTGGA | CTTT-GTAGA | TTTACTTAAA | TCAATTCACA | GGAAGTTACC | TGCCGAATTA | CCTGGGCTCC | CGGGTAGGCT | ATAGTTAACT                | TTTGGACTT- | 400 |
| Metarhizium robertsii_ARSEF_7532        | TATTTTTGGA | CTTT-GTAGA | TTTACTTAAA | TCAATTCACA | GGAAGTTACC | TGCCGAATTA | CCTGGGCTCC | CGGGTAGGCT | ATAGTTAACT                | TTTGGACTT- | 400 |
| Metarhizium robertsii_ARSEF_8070        | TATTTTTGGA | CTTT-GTAGA | TTTACTTAAA | TCAATTCACA | GGAAGTTACC | TGCCGAATTA | CCTGGGCTCC | CGGGTAGGCT | ATAGTTAACT                | TTTGGACTT- | 400 |
| Metarhizium robertsii_ARSEF_8685        | TATTTTTGGA | CTTT-GTAGA | TTTACTTAAA | TCAATTCACA | GGAAGTTACC | TGCCGAATTA | CCTGGGCTCC | CGGGTAGGCT | ATAGTTAACT                | TTTGGACTT- | 400 |

|                                         |            |            |            |            |            |            |            |            |            |            |     |
|-----------------------------------------|------------|------------|------------|------------|------------|------------|------------|------------|------------|------------|-----|
| mani-IDF1                               | -----      | -----      | -----      | -----      | -----      | -----      | -----      | -----      | -----      | -----      | 500 |
| mani-IDR1                               | -----      | -----      | -----      | -----      | -----      | -----      | -----      | -----      | -----      | -----      | 500 |
| Metarhizium_anisopliae_TYPE_ARSEF_7487  | -----      | -----      | ----GCGACT | ATAACCTGGG | ATTTTCCCAG | CCATA--GCT | CACGGGTAGG | CTAGTTGTGA | TTTTTGGACT | TGGTGAAATT | 500 |
| Metarhizium_anisopliae_ARSEF_1080       | -----      | -----      | ----GCGACT | ATAACCTGGG | ATTTTCCCAG | CCAGA--GCT | CACGGGTAGG | CTAGTTGTGA | TTTTTGGACT | TGGTGAAATT | 500 |
| Metarhizium_anisopliae_ARSEF_6347       | -----      | -----      | ----GCGACT | ATAACCTGGG | ATTTTCCCAG | CCAGA--GCT | CACGGGTAGG | CTAGTTGTGA | TTTTTGGACT | TGGTGAAATT | 500 |
| Metarhizium_anisopliae_ARSEF_7450       | -----      | -----      | ----GCGACT | ATAACCTGGG | ATTTTCCCAG | CCATA--GCT | CACGGGTAGG | CTAGTTGTGA | TTTTTGGACT | TGGTGAAATT | 500 |
| Metarhizium_anisopliae_ARSEF_798        | -----      | -----      | ----GCGACT | ATAACCTGGG | ATTTTCCCAG | CCAGA--GCT | CACGGGTAGG | CTAGTTGTGA | TTTTTGGACT | TGGTGAAATT | 500 |
| Metarhizium_anisopliae_ART_2062         | -----      | -----      | ----GCGACT | ATAACCTGGG | ATTTTCCCAG | CCATA--GCT | CACGGGTAGG | CTAGTTGTGA | TTTTTGGACT | TGGTGAAATT | 500 |
| mbru-IDF1                               | GCGGA----- | -----      | -----      | -----      | -----      | -----      | -----      | -----      | -----      | -----      | 500 |
| mbru-IDR1                               | -----      | -----      | -----      | -----      | -----      | -----      | -----      | -----      | -----      | -----      | 500 |
| Metarhizium_brunneum_TYPE_ARSEF_2107    | GCGGATTTTT | TTAAACTTAC | TTCCCCGACT | ATAACCTGGG | ATTTTCCCAG | CCATA--GCT | CACGGGTAGG | TAAGTTGTGA | TTTTTGGACT | TGGTGAAATT | 500 |
| Metarhizium_brunneum_ARSEF_1066         | GCGGATTTTT | TTAAACTTAC | TTCCCCGACT | ATAACCTGGG | ATTTTCCCAG | CCATG--GCT | CACGGGTAGG | TTAGTTGTGA | TTTTTGGACT | TGGTGAAATT | 500 |
| Metarhizium_brunneum_ARSEF_1278         | GCGGATTTTT | TTAAACTTAC | TTCCCCGACT | ATAACCTGGG | ATTTTCCCAG | CCATA--GCT | CACGGGTAGG | TTAGTTGTGA | TTTTTGGAC- | -GGTGAAATT | 500 |
| Metarhizium_brunneum_ARSEF_3295         | GCGGATTTTT | TTAAACTTAC | TTCCCCCACT | ATGACCTGGG | ATTTTCCCAG | CCATA--GCT | CACGGGTAGG | TTAGTTGTGA | T-----     | -----      | 500 |
| Metarhizium_brunneum_ARSEF_3826         | GCGGATTTTT | TTAAACTTAC | TTCCCCGACT | ATAACCTGGG | ATTTTCCCAG | CCATG--GCT | CACGGGTAGG | TTAGTTGTGA | TTTTTGGACT | TGGTGAAATT | 500 |
| Metarhizium_brunneum_ARSEF_4152         | GCGGATTTTT | TTCAACCTAC | TTCCCCGACT | ATAACCTGGG | ATTTTCCCAG | CCATA--GCT | CACGGGTAGG | TTAGTTGTGA | TTTTTGGACT | TGGTGAAATT | 500 |
| Metarhizium_brunneum_ARSEF_4179         | GCGGATTTTT | TTCAACCTAC | TTCCCCGACT | ATAACCTGGG | ATTTTCCCAG | CCATA--GCT | CACGGGTAGG | TTAGTTGTGA | TTTTTGGACT | TGGTGAAATT | 500 |
| Metarhizium_brunneum_ARSEF_5198         | GCGGATTTTT | TTAAACTTAC | TTCCCCGACT | ATAACCTGGG | ATTTTCCCAG | CCATG--GCT | CACGGGTAGG | TTAGTTGTGA | TTTTTGGACT | TGGTGAAATT | 500 |
| Metarhizium_brunneum_ARSEF_7524         | GCGGATTTTT | TTAAACTTAC | TTCCCCGACT | ATAACCTGGG | ATTTTCCCAG | CCATG--GCT | CACGGGTAGG | TTAGTTGTGA | TTTTTGGACT | TGGTGAAATT | 500 |
| Metarhizium_brunneum_ARSEF_988          | GCGGATTTTT | TTAAACTTAC | TTCCCCCACT | ATAACCTGGG | ATTTTCCCAG | CCATA--GCT | CACGGGTAGG | TTAGTTGTGA | T-----     | -----      | 500 |
| Metarhizium_brunneum_ART_2825           | GCGGATTTTT | TTAAACTTAC | TTCCCCGACT | ATAACCTGGG | ATTTTCCCAG | CCATA--GCT | CACGGGTAGG | TTAGTTGTGA | T-----     | -----      | 500 |
| mpin-IDF1                               | -----      | -----      | -----      | -----      | -----      | -----      | -----      | -----      | -----      | -----      | 500 |
| mpin-IDR1                               | -----      | -----      | -----      | -----      | -----      | -----      | -----      | -----      | -----      | -----      | 500 |
| Metarhizium_pingshaense_TYPE_CBS_257.90 | -----      | -----      | ----TCGACT | ATAACCTGGG | ATTTTCCCAG | CTATA--GCT | CACGGGTAGG | TTAGTTGTGA | TTTTTGGAC- | -GGTGAAATT | 500 |
| Metarhizium_pingshaense_ARSEF_2809      | -----      | -----      | ----CCGACT | ATAACCTGGG | ATTTTCCCAG | CTATA--GCT | CACGGGTAGG | TTAGTTGTGG | TTTTTGGACT | TGGTGAAATT | 500 |
| Metarhizium_pingshaense_ARSEF_3210      | -----      | -----      | ----TCGACT | ATAACCTGGG | ATTTTCCCAG | CTATATAGCT | CACGGGTAGG | TTAGTTGTGA | TTTTTGGACT | TGGTGAAATT | 500 |
| Metarhizium_pingshaense_ARSEF_4342      | -----      | -----      | ----CCGACT | ATAACCTGGG | ATTTTCCCAG | CTATA--GCT | CACGGGTAGG | TTAGTTGTGA | TTTTTGGACT | TGGTGAAATT | 500 |
| Metarhizium_pingshaense_ARSEF_7422      | -----      | -----      | ----CCGACT | ATAACCTGGG | ATTTTCCCAG | CTATA--GCT | CACGGGTAGG | TTAGTTGTGA | TTTTTGGAGA | CGGTGAAACT | 500 |
| Metarhizium_pingshaense_ARSEF_7929      | -----      | -----      | ----TCGACT | ATAACCTGGG | ATTTTCCCAG | CTATATAGCT | CACGGGTAGG | TTAGTTGTGA | TTTTTGGACT | TGGTGAAATT | 500 |
| mrob-IDF1                               | -----      | -----      | -----      | -----      | -----      | -----      | -----      | -----      | -----      | -----      | 500 |
| mrob-IDR1                               | -----      | -----      | -----      | -----      | -----      | -----      | -----      | -----      | -----      | -----      | 500 |
| Metarhizium_robertsii_TYPE_ARSEF_2575   | -----      | -----      | ----CCGACT | ATAACCTGGG | ATTTTCCCAG | CCATA--GCT | CACGGGTAGG | TTAGTTGTGA | TTTTTGGACT | CGGTGAAATT | 500 |
| Metarhizium_robertsii_ARSEF_6472        | -----      | -----      | ----CCGACT | ATAACCTGGG | ATTTTCCCAG | CCATA--GCT | CACGGGTAGG | TTAGTTGTGA | TTTTTGGACT | CGGTGAAATT | 500 |
| Metarhizium_robertsii_ARSEF_727         | -----      | -----      | ----CCGACT | ATAACCTGGG | ATTTTCCCAG | CCATA--GCT | CACGGGTAGG | TTAGTTGTGA | TTTTTGGACT | CGGTGAAATT | 500 |
| Metarhizium_robertsii_ARSEF_7501        | -----      | -----      | ----CCGACT | ATAACCTGGG | ATTTTCCCAG | CCATA--GCT | CACGGGTAGG | TTAGTTGTGA | TTTTTGGACT | CGGTGAAATT | 500 |
| Metarhizium_robertsii_ARSEF_7532        | -----      | -----      | ----CCGACT | ATAACCTGGG | ATTTTCCCAG | CCATA--GCT | CACGGGTAGG | TTAGTTGTGA | TTTTTGGACT | CGGTGAAATT | 500 |
| Metarhizium_robertsii_ARSEF_8070        | -----      | -----      | ----CCGACT | ATAACCTGGG | ATTTTCCCAG | CCATA--GCT | CACGGGTAGG | TTAGTTGTGA | TTTTTGGACT | CGGTGAAATT | 500 |
| Metarhizium_robertsii_ARSEF_8685        | -----      | -----      | ----CCGACT | ATAACCTGGG | ATTTTCCCAG | CCATA--GCT | CACGGGTAGG | TTAGTTGTGA | TTTTTGGACT | CGGTGAAATT | 500 |



|                                         |            |            |            |            |            |            |            |            |            |            |     |
|-----------------------------------------|------------|------------|------------|------------|------------|------------|------------|------------|------------|------------|-----|
| mani-IDF1                               | -----      | -----      | -----      | -----      | -----      | -----      | -----      | -----      | -----      | -----      | 700 |
| mani-IDR1                               | -----      | -----      | -----      | -----      | -----      | -----      | -----      | -----      | -----      | -----      | 700 |
| Metarhizium_anisopliae_TYPE_ARSEF_7487  | AAATATGCCA | AGTCCACAAA | TGAATCGCAG | CCTACCCGGT | AGGTAAGCCT | GTGTAGTTTC | CGTGTAATTT | TCCCGTAAAG | ACCAAAAAGT | CAGGTGTTTT | 700 |
| Metarhizium_anisopliae_ARSEF_1080       | AAATGTGCCA | AGTCCACAAA | TTAATCGTAG | CCTACCCGGT | AGGTAAGCCT | GTGTAGTTTC | CGTGTAATTT | TCCCGCAAAG | ACCAAAAAGT | CAGGTGTTTT | 700 |
| Metarhizium_anisopliae_ARSEF_6347       | AAATGTGCCA | AGTCCACAAA | TTAATCGTAG | CCTACCCGGT | AGGTAAGCCT | GTGTAGTTTC | CGTGTAATTT | TCCCGCAAAG | ACCAAAAAGT | CAGGTGTTTT | 700 |
| Metarhizium_anisopliae_ARSEF_7450       | AAATATGCCA | AGTCCACAAA | TGAATCGCAG | CCTACCCGGT | AGGTAAGCCT | GTGTAGTTTC | CGTGTAATTT | TCCCGTAAAG | ACCAAAAAGT | CAGGTGTTTT | 700 |
| Metarhizium_anisopliae_ARSEF_798        | AAATGTGCCA | AGTCCACAAA | TTAATCGTAG | CCTACCCGGT | AGGTAAGCCT | GTGTAGTTTC | CGTGTAATTT | TCCCGCAAAG | ACCAAAAAGT | CAGGTGTTTT | 700 |
| Metarhizium_anisopliae_ART_2062         | AAATATGCCA | AGTCCACAAA | TGAATCGCAG | CCTACCCGGT | AGGTAAGCCT | GTGTAGTTTC | CGTGTAATTT | TCCCGTAAAG | ACCAAAAAGT | CAGGTGTTTT | 700 |
| mbru-IDF1                               | -----      | -----      | -----      | -----      | -----      | -----      | -----      | -----      | -----      | -----      | 700 |
| mbru-IDR1                               | -----      | -----      | -----      | -----      | -----      | -----      | -----      | -----      | -----      | -----      | 700 |
| Metarhizium_brunneum_TYPE_ARSEF_2107    | AAATCTGCCA | AGTCCACAAG | TTAACTATAG | CCTACCCGGG | A----GGCCT | GGGTGTTTCC | CGCGTGATTT | -CCTGTAAAA | ACAAAAAAGT | TAGGTGTTTT | 700 |
| Metarhizium_brunneum_ARSEF_1066         | AAATCTGCCA | AGTCCACAAG | TTAACTATAG | CCTACCCGGT | A----GACCT | GGGTGTTTCC | CGCGTGATTT | -CCTGTGAAA | ACAAAAAAGT | TAGGTGTTTT | 700 |
| Metarhizium_brunneum_ARSEF_1278         | AAATCTGCCA | AGTCCACAAG | TTAACTATAG | CCTACCCGGT | A----GGCCT | GGGTGCTTCC | CGCGTGTTTT | -CCTGTAAAA | ACAAAAAAGT | TAGGTGTTTT | 700 |
| Metarhizium_brunneum_ARSEF_3295         | -----A     | AGTCCACAAA | TAAATTACAG | CCTACCCGGT | A----GGCCT | GTATATTTCC | CGCGCGATTT | -CCTGTGAAG | ACCAAAAAGT | TAGGTGTTTT | 700 |
| Metarhizium_brunneum_ARSEF_3826         | AAATCTGCCA | AGTCCACAAG | TTAACTATAG | CCTACCCGGT | A----GACCT | GGGTGTTTCC | CGCGTGATTT | -CCTGTGAAA | ACAAAAAAGT | TAGGTGTTTT | 700 |
| Metarhizium_brunneum_ARSEF_4152         | AAATCTGCCA | AGTCCACAGA | TAAACTATAG | CCTACCCGGT | A----GGCCT | GTAGATTTCC | CGCGCGATTT | -CCTGCGAAG | ACCAAAAAGT | TAGGTGTTTT | 700 |
| Metarhizium_brunneum_ARSEF_4179         | AAATCTGCCA | AGTCCACAGA | TAAACTATAG | CCTACCCGGT | A----GGCCT | GTAGATTTCC | CGCGCGATTT | -CCTGCGAAG | ACCAAAAAGT | TAGGTGTTTT | 700 |
| Metarhizium_brunneum_ARSEF_5198         | AAATCTGCCA | AGTCCACAAG | TTAACTATAG | CCTACCCGGT | A----GACCT | GGGTGTTTCC | CGCGTGATTT | -CCTGTGAAA | ACAAAAAAGT | TAGGTGTTTT | 700 |
| Metarhizium_brunneum_ARSEF_7524         | AAATCTGCCA | AGTCCACAAG | TTAACTATAG | CCTACCCGGT | A----GACCT | GGGTGTTTCC | CGCGTGATTT | -CCTGTGAAA | ACAAAAAAGT | TAGGTGTTTT | 700 |
| Metarhizium_brunneum_ARSEF_988          | -----A     | AGTCCACAAA | TAAATTACAG | CCTACCCGGT | A----GGCCT | GTATATTTCC | CGCGCGATTT | -CCTGTGAAG | ACCAAAAAGT | TAGGTGTTTT | 700 |
| Metarhizium_brunneum_ART_2825           | -----A     | AGTCCACAAA | TAAATTACAG | CCTACCCGGT | A----GGCCT | GTATATTTCC | CGCGCGATTT | -CCTGTGAAG | ACCAAAAAGT | TAGGTGTTTT | 700 |
| mpin-IDF1                               | -----      | -----      | -----      | -----      | -----      | -----      | -----      | -----      | -----      | -----      | 700 |
| mpin-IDR1                               | -----      | -----      | -----      | -----      | -----      | -----      | -----      | -----      | -----      | -----      | 700 |
| Metarhizium_pingshaense_TYPE_CBS_257.90 | AAATATGCCA | AGTCCACAAA | TCAATCGCAG | CCTACCCGGT | A-----     | -----      | -----      | -----      | -----      | -----      | 700 |
| Metarhizium_pingshaense_ARSEF_2809      | AAATATGCCA | AGTCCACAAA | TCAACCGCAG | CCTACCCGGT | A-----     | -----      | -----      | -----      | -----      | -----      | 700 |
| Metarhizium_pingshaense_ARSEF_3210      | AAATATGCCA | AGTCCACAAA | TCAATCGCAG | CCTACCCGGT | A-----     | -----      | -----      | -----      | -----      | -----      | 700 |
| Metarhizium_pingshaense_ARSEF_4342      | AAATATGCCA | AGTCCACAAA | TTAATCGCAG | CCTACCCGGT | A----AGCCT | GTGTAATTT- | -----      | -----      | -----      | -----      | 700 |
| Metarhizium_pingshaense_ARSEF_7422      | AAATATGCCA | AGTCCACAAA | TTAATCGCAG | CCTACCCGGT | A----AGCCT | GTGTAATTTT | TGTGTAATTT | -CCCGTAAAG | ACCAAAAAGT | TGGGTATTTT | 700 |
| Metarhizium_pingshaense_ARSEF_7929      | AAATATGCCA | AGTCCACAAA | TCAATCGCAG | CCTACCCGGT | A-----     | -----      | -----      | -----      | -----      | -----      | 700 |
| mrob-IDF1                               | -----      | -----      | -----      | -----      | -----      | -----      | -----      | -----      | -----      | -----      | 700 |
| mrob-IDR1                               | -----      | -----      | -----      | -----      | -----      | -----      | -----      | -----      | -----      | -----      | 700 |
| Metarhizium_robertsii_TYPE_ARSEF_2575   | AAATGTGCCA | AGTCCACAAA | TCAATCGCAG | CCTACCCGGT | AGGTAAGCCT | GTGTAGTTTC | CGAGTAATTT | TCCCGTAAAG | ACCAAAAAGT | CAGGTATTTT | 700 |
| Metarhizium_robertsii_ARSEF_6472        | AAATGTGCCA | AGTCCACAAA | TCAATCGCAG | CCTACCCGGT | AGGTAAGCCT | GTGTGATTTT | CGTGTAATTT | -CCCGTAAAG | ACCAAAAAGT | TAGGTATTTT | 700 |
| Metarhizium_robertsii_ARSEF_727         | AAATGTGCCA | AGTCCACAAA | TCAATCGCAG | CCTACCCGGT | AGGTAAGCCT | GTGTGATTTT | CGTGTAATTT | -CCCGTAAAG | ACCAAAAAGT | TAGGTATTTT | 700 |
| Metarhizium_robertsii_ARSEF_7501        | AAATGTGCCA | AGTCCACAAA | TCAATCGCAG | CCTACCTGGT | AGGTAAGCCT | GTGTAGTTTC | CGTGTAATTT | TCCCGTAAAG | ACCAAAAAGT | CAGGTATTTT | 700 |
| Metarhizium_robertsii_ARSEF_7532        | AAATGTGCCA | AGTCCACAAA | TCAATCGCAG | CCTACCCGGT | AGGTAAGCCT | GTGTGATTTT | CGTGTAATTT | -CCCGTAAAG | ACCAAAAAGT | TAGGTATTTT | 700 |
| Metarhizium_robertsii_ARSEF_8070        | AAATGTGCCA | AGTCCACAAA | TCAATCGCAG | CCTACCCGGT | AGGTAAGCCT | GTGTGATTTT | CGTGTAATTT | -CCCGTAAAG | ACCAAAAAGT | TAGGTATTTT | 700 |
| Metarhizium_robertsii_ARSEF_8685        | AAATGTGCCA | AGTCCACAAA | TCAATCGCAG | CCTACCCGGT | AGGTAAGCCT | GTGTAGTTTC | CGAGTAATTT | TCCCGTAAAG | ACCAAAAAGT | CAGGTATTTT | 700 |

|                                         |            |            |                              |            |            |             |            |                        |            |            |     |
|-----------------------------------------|------------|------------|------------------------------|------------|------------|-------------|------------|------------------------|------------|------------|-----|
| mani-IDF1                               | -----      | -----      | -----                        | -----      | -----      | -----       | -----      | -----                  | -----      | 800        |     |
| mani-IDR1                               | -----      | -----      | ATATAGGC GTGAGTTGAT TTTTTG-T | -----      | -----      | -----       | -----      | -----                  | -----      | 800        |     |
| Metarhizium_anisopliae_TYPE_ARSEF_7487  | AGTATTTAAT | TTATATAGGC | GTGAGTTGAT                   | TTTTTTG-TT | TTTCTATATT | AATAAAATTTT | GCGGAAAATA | AAAAATAAGC             | TATAAAAACC | TGGTAACAGA | 800 |
| Metarhizium_anisopliae_ARSEF_1080       | AGTATTTAAT | TTATATAGGC | GTGAGTTGAT                   | TTTTTTG-TT | TTTTTATATT | AATAAAATTTT | GCGGAAAATA | AAAAATAAGC             | TATAAAAACC | TGGTAACAAA | 800 |
| Metarhizium_anisopliae_ARSEF_6347       | AGTATTTAAT | TTATATAGGC | GTGAGTTGAT                   | TTTTTTG-TT | TTTTTATATT | AATAAAATTTT | GCGGAAAATA | AAAAATAAGC             | TATAAAAACC | TGGTAACAAA | 800 |
| Metarhizium_anisopliae_ARSEF_7450       | AGTATTTAAT | TTATATAGGC | GTGAGTTGAT                   | TTTTTTG-TT | TTTCTATATT | AATAAAATTTT | GCGGAAAATA | AAAAATAAGC             | TATAAAAACC | TGGTAACAGA | 800 |
| Metarhizium_anisopliae_ARSEF_798        | AGTATTTAAT | TTATATAGGC | GTGAGTTGAT                   | TTTTTTG-TT | TTTTTATATT | AATAAAATTTT | GCGGAAAATA | AAAAATAAGC             | TATAAAAACC | TGGTAACAAA | 800 |
| Metarhizium_anisopliae_ART_2062         | AGTATTTAAT | TTATATAGGC | GTGAGTTGAT                   | TTTTTTG-TT | TTTCTATATT | AATAAAATTTT | GCGGAAAATA | AAAAATAAGC             | TATAAAAACC | TGGTAACAGA | 800 |
| mbru-IDF1                               | -----      | -----      | -----                        | -----      | -----      | -----       | -----      | -----                  | -----      | 800        |     |
| mbru-IDR1                               | -----      | -----      | -----                        | -----      | -----      | -----       | -----      | AC CACGAGAGCC YRGTAGCC | -----      | 800        |     |
| Metarhizium_brunneum_TYPE_ARSEF_2107    | AGTACTTAAT | TTATATAGGT | ATAAGTTAAT                   | TTTTTTG-TT | TTCTTATATA | AATAAAATTTT | GCGGAAAATA | AAAAATAAAC             | CACGAGAGCC | CGGTAGCGGA | 800 |
| Metarhizium_brunneum_ARSEF_1066         | AGTACTTAAT | TTATGTAGGT | ATGGGTTGAT                   | TTTTTTG-TT | TTCTTATATA | AATAAAATTTT | GCGGAAAATA | AAAAATAAAC             | CACGAGAGCC | CGGTAGCGGA | 800 |
| Metarhizium_brunneum_ARSEF_1278         | AGTACTTAAT | TTATATAGGT | ATAAGTTGAT                   | TTTTTTG-TT | TTCTTATATA | AATAAAATTTT | GCGGAAAATA | AAAAATAAAC             | CACGAGAGCC | CGGTAGCGGA | 800 |
| Metarhizium_brunneum_ARSEF_3295         | AGTACTTAAT | TTATATAGGT | ATAAGTTGAT                   | TTTTTTGTTT | TTTTTATATA | TATAAAATTTT | GCGGGAAATA | AAAAATAAAC             | CACGAGAGCC | CGGTAGCGGA | 800 |
| Metarhizium_brunneum_ARSEF_3826         | AGTACTTAAT | TTATATAGGT | ATGGGTTGAT                   | TTTTTTG-TT | TTCTTATATA | AATAAAATTTT | GCGGAAAATA | AAAAATAAAC             | CACGAGAGCC | CGGTAGCGGA | 800 |
| Metarhizium_brunneum_ARSEF_4152         | GGTACTTAAT | TTATATAGAG | ATGAGTTGAT                   | TTTTTTG-TT | TTTATATATA | AATAAAATTTT | GCGGAAAATA | AAAAATAAAC             | CACGAGAGCC | TAGTAGCGGA | 800 |
| Metarhizium_brunneum_ARSEF_4179         | GGTACTTAAT | TTATATAGAG | ATGAGTTGAT                   | TTTTTTG-TT | TTTATATATA | AATAAAATTTT | GCGGAAAATA | AAAAATAAAC             | CACGAGAGCC | TAGTAGCGGA | 800 |
| Metarhizium_brunneum_ARSEF_5198         | AGTACTTAAT | TTATGTAGGT | ATGGGTTGAT                   | TTTTTTG-TT | TTCTTATATA | AATAAAATTTT | GCGGAAAATA | AAAAATAAAC             | CACGAGAGCC | CGGTAGCGGA | 800 |
| Metarhizium_brunneum_ARSEF_7524         | AGTACTTAAT | TTATGTAGGT | ATGGGTTGAT                   | TTTTTTG-TT | TTCTTATATA | AATAAAATTTT | GCGGAAAATA | AAAAATAAAC             | CACGAGAGCC | CGGTAGCGGA | 800 |
| Metarhizium_brunneum_ARSEF_988          | AGTACTTAAT | TTATATAGGT | ATAAGTTGAT                   | TTTTTTGTTT | TTTTTATATA | TATAAAATTTT | GCGGGAAATA | AAAAATAAAC             | CACGAGAGCC | CGGTAGCGGA | 800 |
| Metarhizium_brunneum_ART_2825           | AGTACTTAAT | TTATATAGGT | ATAAGTTGAT                   | TTTTTTG-TT | TTTATATATA | TATAAAATTTT | GCGGAAAATA | AAAAATAAAC             | CACGAGAGCC | CGGTAGCGGA | 800 |
| mpin-IDF1                               | -----      | -----      | -----                        | -----      | -----      | -----       | -----      | -----                  | -----      | 800        |     |
| mpin-IDR1                               | -----      | -----      | -----                        | -----      | -----      | -----       | -----      | -----                  | -----      | 800        |     |
| Metarhizium_pingshaense_TYPE_CBS_257.90 | -----      | -----AGT   | ATAAGTTGAT                   | TTTTTT--TT | -ATATATATA | AATAAAATCT  | GCGGAAAATA | AAAAATAAGC             | TATAAAGGCC | TGGTAGCGGA | 800 |
| Metarhizium_pingshaense_ARSEF_2809      | -----      | -----AGT   | ATAAGTTGAT                   | CTTTTT--TT | TATATATGTA | AATAAAATTTT | GCGGAAAATA | AAAAATAAGC             | TATAAAGGCC | TGGTAGCGGA | 800 |
| Metarhizium_pingshaense_ARSEF_3210      | -----      | -----AGT   | ATAAGTTGAT                   | TTTTTT--TT | TATATATATA | AATAAAATTTT | GCGGAAAATA | AAAAATAAGC             | TATAAAGGCC | TGGTAGCGGA | 800 |
| Metarhizium_pingshaense_ARSEF_4342      | -----      | -----      | -----                        | -----      | -----      | -----TTT    | GCGGAAAATA | AAAAATAAGC             | TATAAAGGCC | TGGTAGCGGA | 800 |
| Metarhizium_pingshaense_ARSEF_7422      | AGTACTTAAT | TTATATAAGT | ATAAGTTGAT                   | TTTTTTG-TT | TTTTTATATA | AATAAAATTTT | GCGGAAAATA | AAAAATAAGC             | TATAAAGGCC | TGGTAGCGCA | 800 |
| Metarhizium_pingshaense_ARSEF_7929      | -----      | -----AGT   | ATAAGTTGAT                   | TTTTTT--TT | TATATATATA | AATAAAATTTT | GCGGAAAATA | AAAAATAAGC             | TATAAAGGCC | TGGTAGCGGA | 800 |
| mrob-IDF1                               | -----      | -----      | -----                        | -----      | -----      | -----       | -----      | -----                  | -----      | 800        |     |
| mrob-IDR1                               | -----      | -----      | -----                        | -----      | -----      | -----       | -----      | -----                  | -----      | 800        |     |
| Metarhizium_robertsii_TYPE_ARSEF_2575   | GGTACTTAAT | TTATATAAGT | ACAAGTTGAT                   | TTTTTTG-TT | TTTTTATATA | AATAAAATTTT | GCGGAAAATA | AAAAATAAGC             | TATAAAGGCC | TGGTAGCGGA | 800 |
| Metarhizium_robertsii_ARSEF_6472        | GGTACTTAAT | TTATATAAGT | ACAAGTTGAT                   | TTTTTTG-TT | TTTTTATATA | AATAAAATTTT | GCGGAAAATA | AAAAATAAGC             | TATAAAGGCC | TGGTAGCGGA | 800 |
| Metarhizium_robertsii_ARSEF_727         | GGTACTTAAT | TTATATAAGT | ACAAGTTGAT                   | TTTTTTG-TT | TTTTTATATA | AATAAAATTTT | GCGGAAAATA | AAAAATAAGC             | TATAAAGGCC | TGGTAGCGGA | 800 |
| Metarhizium_robertsii_ARSEF_7501        | GGTACTTAAT | TTATATAAGT | ACAAGTTGAT                   | TTTTTTG-TT | TTTTTATATA | AATAAAATTTT | GCGGAAAATA | AAAAATAAGC             | TATAAAGGCC | TGGTAGCGGA | 800 |
| Metarhizium_robertsii_ARSEF_7532        | GGTACTTAAT | TTATATAAGT | ACAAGTTGAT                   | TTTTTTG-TT | TTTTTATATA | AATAAAATTTT | GCGGAAAATA | AAAAATAAGC             | TATAAAGGCC | TGGTAGCGGA | 800 |
| Metarhizium_robertsii_ARSEF_8070        | GGTACTTAAT | TTATATAAGT | ACAAGTTGAT                   | TTTTTTG-TT | TTTTTATATA | AATAAAATTTT | GCGGAAAATA | AAAAATAAGC             | TATAAAGGCC | TGGTAGCGGA | 800 |
| Metarhizium_robertsii_ARSEF_8685        | GGTACTTAAT | TTATATAAGT | ACAAGTTGAT                   | TTTTTTG-TT | TTTTTATATA | AATAAAATTTT | GCGGAAAATA | AAAAATAAGC             | TATAAAGGCC | TGGTAGCGGA | 800 |



|                                         |            |            |            |            |            |            |            |            |            |            |     |
|-----------------------------------------|------------|------------|------------|------------|------------|------------|------------|------------|------------|------------|-----|
| mani-IDF1                               | -----      | -----      | -----      | -----      | -----      | -----      | -----      | -----      | -----      | -----      | 900 |
| mani-IDR1                               | -----      | -----      | -----      | -----      | -----      | -----      | -----      | -----      | -----      | -----      | 900 |
| Metarhizium_anisopliae_TYPE_ARSEF_7487  | GGCGGGCCCT | TAAGGTAATT | GGTGGGTATA | TAAGAGGGAG | GGCTGGACAC | GCGTTGCGTT | GTGTATTTCC | ACCACACCCA | ATACTTTTAG | CTTTAGGGTA | 900 |
| Metarhizium_anisopliae_ARSEF_1080       | GGCGGGCTTT | TAAGGTAATT | GGTGGGTATA | TAAGAGGGAG | GGCTGGACAC | GCGTTGCGTT | GTGTATTTCT | ACCATACCCA | ATACTTTTAG | CTTTAGGGTA | 900 |
| Metarhizium_anisopliae_ARSEF_6347       | GGCGGGCTTT | TAAGGTAATT | GGTGGGTATA | TAAGAGGGAG | GGCTGGACAC | GCGTTGCGTT | GTGTATTTCT | ACCATACCCA | ATACTTTTAG | CTTTAGGGTA | 900 |
| Metarhizium_anisopliae_ARSEF_7450       | GGCGGGCCCT | TAAGGTAATT | GGTGGGTATA | TAAGAGGGAG | GGCTGGACAC | GCGTTGCGTT | GTGTATTTCC | ACCACACCCA | ATACTTTTAG | CTTTAGGGTA | 900 |
| Metarhizium_anisopliae_ARSEF_798        | GGCGGGCTTT | TAAGGTAATT | GGTGGGTATA | TAAGAGGGAG | GGCTGGACAC | GCGTTGCGTT | GTGTATTTCT | ACCATACCCA | ATACTTTTAG | CTTTAGGGTA | 900 |
| Metarhizium_anisopliae_ART_2062         | GGCGGGCCCT | TAAGGTAATT | GGTGGGTATA | TAAGAGGGAG | GGCTGGACAC | GCGTTGCGTT | GTGTATTTCC | ACCACACCCA | ATACTTTTAG | CTTTAGGGTA | 900 |
| mbru-IDF1                               | -----      | -----      | -----      | -----      | -----      | -----      | -----      | -----      | -----      | -----      | 900 |
| mbru-IDR1                               | -----      | -----      | -----      | -----      | -----      | -----      | -----      | -----      | -----      | -----      | 900 |
| Metarhizium_brunneum_TYPE_ARSEF_2107    | GGCAAGCCCT | TAAGGTAGTC | GGTAAGTATA | TAAGAGAGAG | GGCTGGACAC | GCGTCGCGTC | GCGTATTTCC | ACCGCACCTA | ATACTTTTGG | CTTTAGGGTA | 900 |
| Metarhizium_brunneum_ARSEF_1066         | GGCGAGCCCT | TAAGGTAGTC | GGTAAGTATA | TAAGAGAGAG | GGCTGGACAC | GCGTCGCGTC | GCGTATTTCC | ACCGCACCTA | ATACTTTTGG | CTTTAGGGTA | 900 |
| Metarhizium_brunneum_ARSEF_1278         | GGCGAGCCCT | TAAGGTAGTC | GGTAAGTATA | TAAGAGAGAG | GGCTGGACAC | GCGTCGCGTC | GCGTATTTCC | ACCGCACCTA | ATACTTTTGG | CTTTAGGGTA | 900 |
| Metarhizium_brunneum_ARSEF_3295         | GGCGAGCCCT | TAAGGTAGTC | GGTAAGTATA | TAAGAGAGAG | GGCTGGACAC | GCGTCGCGTC | GCGTATTTCC | ACCGCACCTA | ATACTTTTGG | CTTTAGGGTA | 900 |
| Metarhizium_brunneum_ARSEF_3826         | GGCGAGCCCT | TAAGGTAGTC | GGTAAGTATA | TAAGAGAGAG | GGCTGGACAC | GCGTCGCGTC | GCGTATTTCC | ACCGCACCTA | ATACTTTTGG | CTTTAGGGTA | 900 |
| Metarhizium_brunneum_ARSEF_4152         | GGCGGGCCCT | CGAGGTGGTC | GGTAGGTATA | TAAGAGAGAG | GGCTGGACAC | GCGTCGCGTC | GCGTATTTCC | ACCGCAGCCA | ATACCTTTAG | CTTTAGGGTA | 900 |
| Metarhizium_brunneum_ARSEF_4179         | GGCGGGCCCT | CGAGGTGGTC | GGTAGGTATA | TAAGAGAGAG | GGCTGGACAC | GCGTCGCGTC | GCGTATTTCC | ACCGCAGCCA | ATACCTTTAG | CTTTAGGGTA | 900 |
| Metarhizium_brunneum_ARSEF_5198         | GGCGAGCCCT | TAAGGTAGTC | GGTAAGTATA | TAAGAGAGAG | GGCTGGACAC | GCGTCGCGTC | GCGTATTTCC | ACCGCACCTA | ATACTTTTGG | CTTTAGGGTA | 900 |
| Metarhizium_brunneum_ARSEF_7524         | GGCGAGCCCT | TAAGGTAGTC | GGTAAGTATA | TAAGAGAGAG | GGCTGGACAC | GCGTCGCGTC | GCGTATTTCC | ACCGCACCTA | ATACTTTTGG | CTTTAGGGTA | 900 |
| Metarhizium_brunneum_ARSEF_988          | GGCGAGCCCT | TAAGGTAGTC | GGTAAGTATA | TAAGAGAGAG | GGCTGGACAC | GCGTCGCGTC | GCGTATTTCC | ACCGCACCTA | ATACTTTTGG | CTTTAGGGTA | 900 |
| Metarhizium_brunneum_ART_2825           | GGCGAGCCCT | TAAGGTAGTC | GGTAAGTATA | TAAGAGAGAG | GGCTGGACAC | GCGTCGCGTC | GCGTATTTCC | ACCGCACCTA | ATACTTTTGG | CTTTAGGGTA | 900 |
| mpin-IDF1                               | -----      | -----      | -----      | -----      | -----      | -----      | -----      | -----      | -----      | -----      | 900 |
| mpin-IDR1                               | -----      | -----      | -----      | -----      | -----      | -----      | -----      | -----      | -----      | -----      | 900 |
| Metarhizium_pingshaense_TYPE_CBS_257.90 | GGCGAGCTCT | TAAGGTAGTG | GGTGGGTATA | TAAGAGGGAG | GGCTGGACAC | GCGTTGCGCC | GCGTATTTCC | ACCGCACCCA | ATACTTTTAG | CTTTAGGGTA | 900 |
| Metarhizium_pingshaense_ARSEF_2809      | GGCGAGCTCT | TAAGATAGTT | GGTGGGTATA | TAAGAGGGAG | GGCTGGACAC | GCGTTACGCC | GCGTATTTCC | ACCGCACCCA | ATACTTTTAG | CTTTAGGGTA | 900 |
| Metarhizium_pingshaense_ARSEF_3210      | GGCGAGCTCT | TAAGGTAGTG | GGTGGGTATA | TAAGAGGGAG | GGCTGGACAC | GCGTTGCGCC | GCGTATTTCC | ACCGCACCCA | ATACTTTTAG | CTTTAGGGTA | 900 |
| Metarhizium_pingshaense_ARSEF_4342      | GGCGGGCTCC | TAAGGTAGTT | GGTGGGTATA | TAAGAGGGAG | GGCTGGACAC | GCGTTGCGTC | GCGTATTTCC | ACCGCACCCA | ATACTTTTAG | CTTTAGGGTA | 900 |
| Metarhizium_pingshaense_ARSEF_7422      | GGCGGGCTCT | TAAGGTAGTT | GGTGGGTATA | TAAGAGGGAG | GGCTGGAGAC | GCGTTGCGCC | CCGTATTTCC | ACCGTACCCA | ATACTTTTAG | CTTTAGGGTA | 900 |
| Metarhizium_pingshaense_ARSEF_7929      | GGCGAGCTCT | TAAGGTAGTG | GGTGGGTATA | TAAGAGGGAG | GGCTGGACAC | GCGTTGCGCC | GCGTATTTCC | ACCGCACCCA | ATACTTTTAG | CTTTAGGGTA | 900 |
| mrob-IDF1                               | -----      | -----      | -----      | -----      | -----      | -----      | -----      | -----      | -----      | -----      | 900 |
| mrob-IDR1                               | -----      | -----      | -----      | -----      | -----      | -----      | -----      | GGCGCAGCCA | ATACTTTTAG | -----      | 900 |
| Metarhizium_robertsii_TYPE_ARSEF_2575   | GGCGGGCCCT | TAGGGTAGTT | GGTGGGTATA | TGAGAGGGAG | GGCTGGACAC | GCGTCGCGTC | GCGTATTTCC | GCCGCAGCCA | ATACTTTTAG | CTTTAGGGTA | 900 |
| Metarhizium_robertsii_ARSEF_6472        | GGCGGGCCCT | TAGGGTAGTT | GGTGGGTATA | TGAGAGGGAG | GGCTGGACAC | GCGTCGCGTC | GCGTATTTCC | GCCGCAGCCA | ATACTTTTAG | CTTTAGGGTA | 900 |
| Metarhizium_robertsii_ARSEF_727         | GGCGGGCCCT | TAGGGTAGTT | GGTGGGTATA | TGAGAGGGAG | GGCTGGACAC | GCGTCGCGTC | GCGTATTTCC | GCCGCAGCCA | ATACTTTTAG | CTTTAGGGTA | 900 |
| Metarhizium_robertsii_ARSEF_7501        | GGCGGGCCCT | TAGGGTAGTT | GGTGGGTATA | TGAGAGGGAG | GGCTGGACAC | GCGTCGCGTC | GCGTATTTCC | GCCGCAGCCA | ATACTTTTAG | CTTTAGGGTA | 900 |
| Metarhizium_robertsii_ARSEF_7532        | GGCGGGCCCT | TAGGGTAGTT | GGTGGGTATA | TGAGAGGGAG | GGCTGGACAC | GCGTCGCGTC | GCGTATTTCC | GCCGCAGCCA | ATACTTTTAG | CTTTAGGGTA | 900 |
| Metarhizium_robertsii_ARSEF_8070        | GGCGGGCCCT | TAGGGTAGTT | GGTGGGTATA | TGAGAGGGAG | GGCTGGACAC | GCGTCGCGTC | GCGTATTTCC | GCCGCAGCCA | ATACTTTTAG | CTTTAGGGTA | 900 |
| Metarhizium_robertsii_ARSEF_8685        | GGCGGGCCCT | TAGGGTAGTT | GGTGGGTATA | TGAGAGGGAG | GGCTGGACAC | GCGTCGCGTC | GCGTATTTCC | GCCGCAGCCA | ATACTTTTAG | CTTTAGGGTA | 900 |



|                                         |            |            |            |            |            |            |            |            |            |            |      |
|-----------------------------------------|------------|------------|------------|------------|------------|------------|------------|------------|------------|------------|------|
| mani-IDF1                               | -----      | -----      | -----      | -----      | -----      | -----      | -----      | -----      | -----      | -----      | 1100 |
| mani-IDR1                               | -----      | -----      | -----      | -----      | -----      | -----      | -----      | -----      | -----      | -----      | 1100 |
| Metarhizium_anisopliae_TYPE_ARSEF_7487  | CAACTGTAAG | GCTTGTGTGT | GTG-----   | -----      | ---CCGGGGC | CCTGTAAGTC | CCGACCAGGA | ACCCTACAGG | TCACGTGCCG | ATACAATAAG | 1100 |
| Metarhizium_anisopliae_ARSEF_1080       | CAACTGTAAG | GCTTGTGTGT | GTG-----   | -----      | ---CCGGGGC | CCTGTAAGTC | CCGACCAGGA | ACCCTACAGG | TTATGTGCCG | ATACAATAAG | 1100 |
| Metarhizium_anisopliae_ARSEF_6347       | CAACTGTAAG | GCTTGTGTGT | GTG-----   | -----      | ---CCGGGGC | CCTGTAAGTC | CCGACCAGGA | ACCCTACAGG | TTATGTGCCG | ATACAATAAG | 1100 |
| Metarhizium_anisopliae_ARSEF_7450       | CAACTGTAAG | GCTTGTGTGT | GTG-----   | -----      | ---CCGGGGC | CCTGTAAGTC | CCGACCAGGA | ACCCTACAGG | TCACGTGCCG | ATACAATAAG | 1100 |
| Metarhizium_anisopliae_ARSEF_798        | CAACTGTAAG | GCTTGTGTGT | GTG-----   | -----      | ---CCGGGGC | CCTGTAAGTC | CCGACCAGGA | ACCCTACAGG | TTATGTGCCG | ATACAATAAG | 1100 |
| Metarhizium_anisopliae_ART_2062         | CAACTGTAAG | GCTTGTGTGT | GTG-----   | -----      | ---CCGGGGC | CCTGTAAGTC | CCGACCAGGA | ACCCTACAGG | TCACGTGCCG | ATACAATAAG | 1100 |
| mbru-IDF1                               | -----      | -----      | -----      | -----      | -----      | -----      | -----      | -----      | -----      | -----      | 1100 |
| mbru-IDR1                               | -----      | -----      | -----      | -----      | -----      | -----      | -----      | -----      | -----      | -----      | 1100 |
| Metarhizium_brunneum_TYPE_ARSEF_2107    | CAGCTATAAG | GCTTGTGTGT | GTGTGGGTGC | GCGGGTGTGT | GTGCCGGGGC | CCTGTAAGTC | CCGACCAGGA | ACCCTACAGG | TCACGTGCCG | ACACAGTAAG | 1100 |
| Metarhizium_brunneum_ARSEF_1066         | CAGCTATAAG | GCTTGTGTGT | GTGTGGGTGC | GCGGGTGTGT | GTGCCGGGGC | CCTGTAAGTC | CCGACCAGGA | ACCCTACAGG | TCACGTGCCG | ACACAGTAAG | 1100 |
| Metarhizium_brunneum_ARSEF_1278         | CAGCTATAAG | GCTTGTGTGT | GTG-----   | -----      | ---CCGGGGC | CCTGTAAGTC | CCGACCAGGA | ACCCTGCAGG | TCACGTGCCG | ACACAGTAAG | 1100 |
| Metarhizium_brunneum_ARSEF_3295         | CAGCTATAAG | GCTTGTGTGT | GTGTGGGTGC | GCGGGTGTGT | GTGCCGGGGC | CCTGTAAGTC | CCGACCAGGA | ACCCTACAGG | TCACGTGCCG | ACACAGTAAG | 1100 |
| Metarhizium_brunneum_ARSEF_3826         | CAGCTATAAG | GCTTGTGTGT | GTGTGGGTGC | GCGGGTGTGT | GTGCCGGGGC | CCTGTAAGTC | CCGACCAGGA | ACCCTACAGG | TCACGTGCCG | ACACAGTAAG | 1100 |
| Metarhizium_brunneum_ARSEF_4152         | CAGCTATAAA | GCTTGTGTGT | ATG-----   | -----TGT   | GTGCCGGGGC | CCTGTAAGTC | CCGACCAGGA | ACCTTACAGG | TCACGTGCCG | ATACGATAAG | 1100 |
| Metarhizium_brunneum_ARSEF_4179         | CAGCTATAAA | GCTTGTGTGT | ATG-----   | -----TGT   | GTGCCGGGGC | CCTGTAAGTC | CCGACCAGGA | ACCTTACAGG | TCACGTGCCG | ATACGATAAG | 1100 |
| Metarhizium_brunneum_ARSEF_5198         | CAGCTATAAG | GCTTGTGTGT | GTGTGGGTGC | GCGGGTGTGT | GTGCCGGGGC | CCTGTAAGTC | CCGACCAGGA | ACCCTACAGG | TCACGTGCCG | ACACAGTAAG | 1100 |
| Metarhizium_brunneum_ARSEF_7524         | CAGCTATAAG | GCTTGTGTGT | GTGTGGGTGC | GCGGGTGTGT | GTGCCGGGGC | CCTGTAAGTC | CCGACCAGGA | ACCCTACAGG | TCACGTGCCG | ACACAGTAAG | 1100 |
| Metarhizium_brunneum_ARSEF_988          | CAGCTATAAG | GCTTGTGTGT | GTGTGGGTGC | GCGGGTGTGT | GTGCCGGGGC | CCTGTAAGTC | CCGACCAGGA | ACCCTACAGG | TCACGTGCCG | ACACAGTAAG | 1100 |
| Metarhizium_brunneum_ART_2825           | CAGCTATAAG | GCTTGTGTGT | GTGTGGGTGC | GCGGGTGTGT | GTGCCGGGGC | CCTGTAAGTC | CCGACCAGGA | ACCCTACAGG | TCACGTGCCG | ACACAGTAAG | 1100 |
| mpin-IDF1                               | -----      | -----      | GTG-----   | -----      | ---CCGGGGC | CCTGTAAGTC | -----      | -----      | -----      | -----      | 1100 |
| mpin-IDR1                               | -----      | -----      | -----      | -----      | -----      | -----      | -----      | -----      | -----      | -----      | 1100 |
| Metarhizium_pingshaense_TYPE_CBS_257.90 | CAACTGTAAG | GCTTGTGTGT | GTG-----   | -----      | ---CCGGGGC | CCTGTAGGTC | CCGACCAGGA | ACCCTACAGG | CCACGTGCCG | ATATAATAAG | 1100 |
| Metarhizium_pingshaense_ARSEF_2809      | CAACTGTAAG | GCTTGTGTGT | GTG-----   | -----      | ---CCGGGGC | CCTGTAGGTC | CCGACCAGGA | ACCCACAGG  | TCACGTGCC- | -----      | 1100 |
| Metarhizium_pingshaense_ARSEF_3210      | CAACTGTAAG | GCTTGTGTGT | GTG-----   | -----      | ---CCGGGGC | CCTGTAGGTC | CCGACCAGGA | ACCCTACAGG | TCACGTGCCG | ATACAATAAG | 1100 |
| Metarhizium_pingshaense_ARSEF_4342      | CAACTGTAAG | GCTTGTGTGT | GTG-----   | -----      | ---CCGGGGC | CCTGTAGGTC | CCGACCAGGA | ACCCTACAGG | TCACGTGCCG | ATATAATAAG | 1100 |
| Metarhizium_pingshaense_ARSEF_7422      | CAACTGTAAG | GCTTGCCTGT | GTG-----   | -----      | ---CCGGGGC | CCTGTAGGTC | CCGACCAGGA | ACCCTACAGG | TCACGTGCCG | ATATAATAAG | 1100 |
| Metarhizium_pingshaense_ARSEF_7929      | CAACTGTAAG | GCTTGTGTGT | GTG-----   | -----      | ---CCGGGGC | CCTGTAGGTC | CCGACCAGGA | ACCCTACAGG | TCACGTGCCG | ATACAATAAG | 1100 |
| mrob-IDF1                               | -----      | -----      | -----      | -----      | -----      | -----      | -----      | -----      | -----      | -----      | 1100 |
| mrob-IDR1                               | -----      | -----      | -----      | -----      | -----      | -----      | -----      | -----      | -----      | -----      | 1100 |
| Metarhizium_robertsii_TYPE_ARSEF_2575   | CAACTGTAAG | GCTTGTGTGT | GTG-----   | -----      | ---CCGGGGC | CCTGTAAGTC | CCGACCAGGA | ACCCTACAGG | TCACGTGCCG | ATACAATAAG | 1100 |
| Metarhizium_robertsii_ARSEF_6472        | CAACTGTAAG | GCTTGTGTGT | GTG-----   | -----      | ---CCGGGGC | CCTGTAAGTC | CCGACCAGGA | ACCCTACAGG | TCACGTGCCG | ATACAATAAG | 1100 |
| Metarhizium_robertsii_ARSEF_727         | CAACTGTAAG | GCTTGTGTGT | GTG-----   | -----      | ---CCGGGGC | CCTGTAAGTC | CCGACCAGGA | ACCCTACAGG | TCACGTGCCG | ATACAATAAG | 1100 |
| Metarhizium_robertsii_ARSEF_7501        | CAACTGTAAG | GCTTGTGTGT | GTG-----   | -----      | ---CCGGGGC | CCTGTAAGTC | CCGACCAGGA | ACCCTACAGG | TCACGTGCCG | ATACAATAAG | 1100 |
| Metarhizium_robertsii_ARSEF_7532        | CAACTGTAAG | GCTTGTGTGT | GTG-----   | -----      | ---CCGGGGC | CCTGTAAGTC | CCGACCAGGA | ACCCTACAGG | TCACGTGCCG | ATACAATAAG | 1100 |
| Metarhizium_robertsii_ARSEF_8070        | CAACTGTAAG | GCTTGTGTGT | GTG-----   | -----      | ---CCGGGGC | CCTGTAAGTC | CCGACCAGGA | ACCCTACAGG | TCACGTGCCG | ATACAATAAG | 1100 |
| Metarhizium_robertsii_ARSEF_8685        | CAACTGTAAG | GCTTGTGTGT | GTG-----   | -----      | ---CCGGGGC | CCTGTAAGTC | CCGACCAGGA | ACCCTACAGG | TCACGTGCCG | ATACAATAAG | 1100 |



|                                         |            |            |            |            |            |            |             |             |            |            |      |
|-----------------------------------------|------------|------------|------------|------------|------------|------------|-------------|-------------|------------|------------|------|
| mani-IDF1                               | -----      | -----      | -----      | -----      | -----      | -----      | -----       | -----       | -----      | -----      | 1300 |
| mani-IDR1                               | -----      | -----      | -----      | -----      | -----      | -----      | -----       | -----       | -----      | -----      | 1300 |
| Metarhizium_anisopliae_TYPE_ARSEF_7487  | CACGTGTTCC | GCTGCCAAGG | TCCCCGAGGT | CCCCGCGATT | GCCGACCTCG | CCGACTACTC | CTGGTGTAAAT | ATACCGGTGT  | AGTTGTATAT | AATTTCTTAC | 1300 |
| Metarhizium_anisopliae_ARSEF_1080       | CACGTGTTCC | GCTGCCAAGG | TCCCCGAGGT | CCCCGCGATT | GCCGACCTCG | CCGACTACTC | CTGGTGTAAAT | ATGCCCGGTGT | AGTTGTGTAT | AATTTCTTAC | 1300 |
| Metarhizium_anisopliae_ARSEF_6347       | CACGTGTTCC | GCTGCCAAGG | TCCCCGAGGT | CCCCGCGATT | GCCGACCTCG | CCGACTACTC | CTGGTGTAAAT | ATGCCCGGTGT | AGTTGTGTAT | AATTTCTTAC | 1300 |
| Metarhizium_anisopliae_ARSEF_7450       | CACGTGTTCC | GCTGCCAAGG | TCCCCGAGGT | CCCCGCGATT | GCCGACCTCG | CCGACTACTC | CTGGTGTAAAT | ATACCGGTGT  | AGTTGTATAT | AATTTCTTAC | 1300 |
| Metarhizium_anisopliae_ARSEF_798        | CACGTGTTCC | GCTGCCAAGG | TCCCCGAGGT | CCCCGCGATT | GCCGACCTCG | CCGACTACAC | CTGGTGTAAAT | ATGCCCGGTGT | AGTTGTGTAT | AATTTCTTAC | 1300 |
| Metarhizium_anisopliae_ART_2062         | CACGTGTTCC | GCTGCCAAGG | TCCCCGAGGT | CCCCGCGATT | GCCGACCTCG | CCGACTACTC | CTGGTGTAAAT | ATACCGGTGT  | AGTTGTATAT | AATTTCTTAC | 1300 |
| mbru-IDF1                               | -----      | -----      | -----      | -----      | -----      | -----      | -----       | -----       | -----      | -----      | 1300 |
| mbru-IDR1                               | -----      | -----      | -----      | -----      | -----      | -----      | -----       | -----       | -----      | -----      | 1300 |
| Metarhizium_brunneum_TYPE_ARSEF_2107    | CACGTGTCCC | GCTGCCAAGG | TCCCCGAGGT | CCCCGAGGTT | GCCGACCTCG | CCGACTACTC | CTGGTGTAAAT | GTGCCCGGTGC | AGTTGCATAT | AATTCCTTAC | 1300 |
| Metarhizium_brunneum_ARSEF_1066         | CACGTGTCCC | GCTGCCAAGG | TCCCCGAGGT | -----T     | GCCGACCTCG | CCGACTACTC | CTGGTGTAAAT | GTGCCCGGTGC | A-----     | -----      | 1300 |
| Metarhizium_brunneum_ARSEF_1278         | CACGTGTCCC | GCTGCCAAGG | TCCCCGAGGT | CCCCGAGGTT | GCCGACCTCG | CCGACTACTC | CTGGTGTAAAT | GTGCCCGGTGC | AGTTGCATAT | AATTCCTTAC | 1300 |
| Metarhizium_brunneum_ARSEF_3295         | -----      | -----      | -----      | -----      | -----      | -----      | -----       | -----       | -----      | -----      | 1300 |
| Metarhizium_brunneum_ARSEF_3826         | CACGTGTCCC | GCTGCCAAGG | TCCCCGAGGT | -----T     | GCCGACCTCG | CCGACTACTC | CTGGTGTAAAT | GTGCCCGGTGC | A-----     | -----      | 1300 |
| Metarhizium_brunneum_ARSEF_4152         | CACGTGTCCC | GCCGCCAAGG | TCCCCAAGGT | CCCCGAGGTT | GCCGACCTCG | CCGACTACTC | CTGGTGTAAAT | ATGCCCGGTAC | AGTTGCATAT | AATTCCTTAC | 1300 |
| Metarhizium_brunneum_ARSEF_4179         | CACGTGTCCC | GCCGCCAAGG | TCCCCAAGGT | CCCCGAGGTT | GCCGACCTCG | CCGACTACTC | CTGGTGTAAAT | ATGCCCGGTAC | AGTTGCATAT | AATTCCTTAC | 1300 |
| Metarhizium_brunneum_ARSEF_5198         | CACGTGTCCC | GCTGCCAAGG | TCCCCGAGGT | -----T     | GCCGACCTCG | CCGACTACTC | CTGGTGTAAAT | GTGCCCGGTGC | A-----     | -----      | 1300 |
| Metarhizium_brunneum_ARSEF_7524         | CACGTGTCCC | GCTGCCAAGG | TCCCCGAGGT | -----T     | GCCGACCTCG | CCGACTACTC | CTGGTGTAAAT | GTGCCCGGTGC | A-----     | -----      | 1300 |
| Metarhizium_brunneum_ARSEF_988          | -----      | -----      | -----      | -----      | -----      | -----      | -----       | -----       | -----      | -----      | 1300 |
| Metarhizium_brunneum_ART_2825           | -----      | -----      | -----      | -----      | -----      | -----      | -----       | -----       | -----      | -----      | 1300 |
| mpin-IDF1                               | -----      | -----      | -----      | -----      | -----      | -----      | -----       | -----       | -----      | -----      | 1300 |
| mpin-IDR1                               | -----      | -----      | -----      | -----      | -----      | -----      | -----       | -----       | -----      | -----      | 1300 |
| Metarhizium_pingshaense_TYPE_CBS_257.90 | CACGTGTCCC | GCTGCCAAGA | TCCCCGAGGT | -----T     | GCCGACCTCG | CCGACTACTC | CTGGTGTAAAT | GTGCCCGGTGT | AGTTATATAT | AATTTCTTAC | 1300 |
| Metarhizium_pingshaense_ARSEF_2809      | CACGTGTCCC | GCTGCCAAGA | TCCCCGAGGT | -----T     | GCCGACCTCG | CCGACCACTC | CTGGTGTAAAT | GTGCCCGGTGT | AGTTATATAT | AATTTCTTAC | 1300 |
| Metarhizium_pingshaense_ARSEF_3210      | CACGTGTCCC | GCTGCCAAGA | TCCCCGAGGT | -----T     | GCCGACCTCG | CCGACTACTC | CTGGTGTAAAT | GTGCCCGGTGT | AGTTATATAT | AATTTCTTAC | 1300 |
| Metarhizium_pingshaense_ARSEF_4342      | CACGTGTCCC | GCTGCCAAGA | TCCCCGAGAT | -----T     | GCCGACCTCG | CCGACTACTC | CTGGTGTAAAT | GTGCCCGGTGT | AGTTATATAT | AATTTCTTAC | 1300 |
| Metarhizium_pingshaense_ARSEF_7422      | CACGTGTCCC | GCTGCCAAGA | TCCCCGAGGT | -----T     | GCCGACCTCG | CCGACTACTC | CTGGCGTAAT  | GTGCCCGGTGT | AGTTATATAT | AATTTCTTAC | 1300 |
| Metarhizium_pingshaense_ARSEF_7929      | CACGTGTCCC | GCTGCCAAGA | TCCCCGAGGT | -----T     | GCCGACCTCG | CCGACTACTC | CTGGTGTAAAT | GTGCCCGGTGT | AGTTATATAT | AATTTCTTAC | 1300 |
| mrob-IDF1                               | -----      | -----      | -----      | -----      | -----      | -----      | -----       | -----       | -----      | -----      | 1300 |
| mrob-IDR1                               | -----      | -----      | -----      | -----      | -----      | -----      | -----       | -----       | -----      | -----      | 1300 |
| Metarhizium_robertsii_TYPE_ARSEF_2575   | CACGTGTCCC | GCTGCCAAGA | TCCCCGAGAT | -----T     | GCCGACCTCG | CCGACTACTC | TTGGTGTAAAT | GTGCCCGGTGT | -----      | AATTTCTTGC | 1300 |
| Metarhizium_robertsii_ARSEF_6472        | CACGTGTCCC | GCTGCCAAGA | TCCCCGAGAT | -----T     | GCCGACCTCG | CCGACTACTC | TTGGTGTAAAT | GTGCCCGGTGT | -----      | AATTTCTTAC | 1300 |
| Metarhizium_robertsii_ARSEF_727         | CACGTGTCCC | GCTGCCAAGA | TCCCCGAGAT | -----      | GCCGACCTCG | CCGACTACTC | TTGGTGTAAAT | GTGCCCGGTGT | -----      | AATTTCTTAC | 1300 |
| Metarhizium_robertsii_ARSEF_7501        | CACGTGTCCC | GCTGCCAAGA | TCCCCGAGAT | -----T     | GCCGACCTCG | CCGACTACTC | TTGGTGTAAAT | GTGC-----   | -----      | -----      | 1300 |
| Metarhizium_robertsii_ARSEF_7532        | CACGTGTCCC | GCTGCCAAGA | TCCCCGAGAT | -----T     | GCCGACCTCG | CCGACTACTC | TTGGTGTAAAT | GTGCCCGGTGT | -----      | AATTTCTTAC | 1300 |
| Metarhizium_robertsii_ARSEF_8070        | CACGTGTCCC | GCTGCCAAGA | TCCCCGAGAT | -----T     | GCCGACCTCG | CCGACTACTC | TTGGTGTAAAT | GTGCCCGGTGT | -----      | AATTTCTTAC | 1300 |
| Metarhizium_robertsii_ARSEF_8685        | CACGTGTCCC | GCTGCCAAGA | TCCCCGAGAT | -----T     | GCCGACCTCG | CCGACTACTC | TTGGTGTAAAT | GTGCCCGGTGT | -----      | AATTTCTTAC | 1300 |

|                                         |            |            |            |            |            |            |            |            |            |            |      |
|-----------------------------------------|------------|------------|------------|------------|------------|------------|------------|------------|------------|------------|------|
| mani-IDF1                               | -----      | -----      | -----      | -----      | -----      | -----      | -----      | -----      | -----      | -----      | 1400 |
| mani-IDR1                               | -----      | -----      | -----      | -----      | -----      | -----      | -----      | -----      | -----      | -----      | 1400 |
| Metarhizium_anisopliae_TYPE_ARSEF_7487  | TAGTCTTAAT | AGTAGTACAC | TTGTTTATCG | CGATACACTT | ACTTGTGGTG | CGGCTGTGCG | GCTGTGCGGC | TGTGCTGACG | TACTTGTAGT | GGTGCACTTA | 1400 |
| Metarhizium_anisopliae_ARSEF_1080       | TAGTCTTAAT | AGTAGTACAC | TTGTTTATCG | CGATACACTT | ACTTGTG--- | -----GTGCG | GCTGTGCGGC | TGTGCTGATG | TACTTGTAGT | GGTGCACTTA | 1400 |
| Metarhizium_anisopliae_ARSEF_6347       | TAGTCTTAAT | AGTAGTACAC | TTGTTTATCG | CGATACACTT | ACTTGTG--- | -----GTGCG | GCTGTGCGGC | TGTGCTGATG | TACTTGTAGT | GGTGCACTTA | 1400 |
| Metarhizium_anisopliae_ARSEF_7450       | TAGTCTTAAT | AGTAGTACAC | TTGTTTATCG | CGATACACTT | ACTTGTGGTG | CGGCTGTGCG | GCTGTGCGGC | TGTGCTGACG | TACTTGTAGT | GGTGCACTTA | 1400 |
| Metarhizium_anisopliae_ARSEF_798        | TAGTCTTAAT | AGTAGTACAC | TTGTTTATCG | CGATACACTT | ACTTGTG--- | -----GTGCG | GCTGTGCGGC | TGTGCTGATG | TACTTGTAGT | GGTGCACTTA | 1400 |
| Metarhizium_anisopliae_ART_2062         | TAGTCTTAAT | AGTAGTACAC | TTGTTTATCG | CGATACACTT | ACTTGTGGTG | CGGCTGTGCG | GCTGTGCGGC | TGTGCTGACG | TACTTGTAGT | GGTGCACTTA | 1400 |
|                                         |            |            |            |            |            |            |            |            |            |            |      |
| mbru-IDF1                               | -----      | -----      | -----      | -----      | -----      | -----      | -----      | -----      | -----      | -----      | 1400 |
| mbru-IDR1                               | -----      | -----      | -----      | -----      | -----      | -----      | -----      | -----      | -----      | -----      | 1400 |
| Metarhizium_brunneum_TYPE_ARSEF_2107    | TAGTCTCAAT | AATAGTACAC | TCGTTTATCG | CGATGCACTC | ACTTGTG--- | -----GTACG | GCTGTGCGGC | TGTGCTGACG | TACTTGTGGT | -----      | 1400 |
| Metarhizium_brunneum_ARSEF_1066         | -----      | -----      | -----      | -----      | -----      | -----      | -----      | -----      | -----      | -----      | 1400 |
| Metarhizium_brunneum_ARSEF_1278         | TAGTCTCAAT | AATAGTACAC | TCGTTTATCG | CGATGCACTC | ACTTGTG--- | -----GTACG | GCTGTGCGGC | TGTGCTGACG | TACTT----- | -----      | 1400 |
| Metarhizium_brunneum_ARSEF_3295         | -----      | -----      | -----      | -----      | -----      | -----      | -----      | -----      | -----      | -----      | 1400 |
| Metarhizium_brunneum_ARSEF_3826         | -----      | -----      | -----      | -----      | -----      | -----      | -----      | -----      | -----      | -----      | 1400 |
| Metarhizium_brunneum_ARSEF_4152         | TAGTCTCAAT | AATAGTACAC | TCGTTTATCG | CGATGCACTT | ACTTGTG--- | -----GTGCG | GCTGTGCGGC | TGTGCTGACG | TACTTGTGGT | AGTGCACTTA | 1400 |
| Metarhizium_brunneum_ARSEF_4179         | TAGTCTCAAT | AATAGTACAC | TCGTTTATCG | CGATGCACTT | ACTTGTG--- | -----GTGCG | GCTGTGCGGC | TGTGCTGACG | TACTTGTGGT | AGTGCACTTA | 1400 |
| Metarhizium_brunneum_ARSEF_5198         | -----      | -----      | -----      | -----      | -----      | -----      | -----      | -----      | -----      | -----      | 1400 |
| Metarhizium_brunneum_ARSEF_7524         | -----      | -----      | -----      | -----      | -----      | -----      | -----      | -----      | -----      | -----      | 1400 |
| Metarhizium_brunneum_ARSEF_988          | -----      | -----      | -----      | -----      | -----      | -----      | -----      | -----      | -----      | -----      | 1400 |
| Metarhizium_brunneum_ART_2825           | -----      | -----      | -----      | -----      | -----      | -----      | -----      | -----      | -----      | -----      | 1400 |
|                                         |            |            |            |            |            |            |            |            |            |            |      |
| mpin-IDF1                               | -----      | -----      | -----      | -----      | -----      | -----      | -----      | -----      | -----      | -----      | 1400 |
| mpin-IDR1                               | -----      | -----      | -----      | -----      | -----      | -----      | -----      | -----      | -----      | -----      | 1400 |
| Metarhizium_pingshaense_TYPE_CBS_257.90 | TAGTCTCAAT | AATAGTACAC | TCGTTTATCG | CGATGCACTC | ACTTGTG--- | -----GTGCG | GGTGTGCGGG | TGTGCTGACG | TACTTGTGGT | GGTGCACTTA | 1400 |
| Metarhizium_pingshaense_ARSEF_2809      | TAGTCTCAAT | AATAGTACAC | TC-----    | -----      | ACTTGTG--- | -----GTGCG | GCTGTGCGGC | TGTGCTGACG | TGCTTGTGGT | GGTGCACTTA | 1400 |
| Metarhizium_pingshaense_ARSEF_3210      | TAGTCTCAAT | AATAGTACAC | TCGTTTATCG | CGATGCACTC | ACTTGTG--- | -----GTGCG | GGTGTGCGGG | TGTGCTGACG | TACTTGTGGT | GGTGCACTTA | 1400 |
| Metarhizium_pingshaense_ARSEF_4342      | TAGTCTCAAT | AATAGTACAC | TCGTTTATCG | CGATGCACTC | ACTTGTG--- | -----      | -----      | -----      | -----GT    | GGTGCACTTA | 1400 |
| Metarhizium_pingshaense_ARSEF_7422      | TAGTCTCAAT | AATAGTACAC | CCGTTTATCG | CGATGCACTC | ACTTGTG--- | -----      | -----      | -----      | -----GT    | GGTGCACTTA | 1400 |
| Metarhizium_pingshaense_ARSEF_7929      | TAGTCTCAAT | AATAGTACAC | TCGTTTATCG | CGATGCACTC | ACTTGTG--- | -----GTGCG | GGTGTGCGGG | TGTGCTGACG | TACTTGTGGT | GGTGCACTTA | 1400 |
|                                         |            |            |            |            |            |            |            |            |            |            |      |
| mrob-IDF1                               | -----      | -----      | -----      | -----      | -----      | -----      | -----      | -----      | -----      | -----      | 1400 |
| mrob-IDR1                               | -----      | -----      | -----      | -----      | -----      | -----      | -----      | -----      | -----      | -----      | 1400 |
| Metarhizium_robertsii_TYPE_ARSEF_2575   | TAGTCTCAAT | AATAGTACAC | TCGTTTATCG | CGATGCACTT | ACTTGTA--- | -----      | ---GTGCGGT | TGTGCTGACG | TACTTGTGGT | GGTGTACTTA | 1400 |
| Metarhizium_robertsii_ARSEF_6472        | TAGTCTCAAT | AATAGTACAC | TCGTTTATCG | CGATGCACTT | ACTTGTA--- | -----      | ---GTGCGGT | TGTGCTGACG | TACTTGTGGT | GGTGTACTTA | 1400 |
| Metarhizium_robertsii_ARSEF_727         | TAGTCTCAAT | AATAGTACAC | TCGTTTATCG | CGATGCACTT | ACTTGTA--- | -----      | ---GTGCGGT | TGTGCTGACG | TACTTGTGGT | GGTGTACTTA | 1400 |
| Metarhizium_robertsii_ARSEF_7501        | -----      | -----      | -----      | -----      | -----      | -----      | -----      | -----      | -----      | -----      | 1400 |
| Metarhizium_robertsii_ARSEF_7532        | TAGTCTCAAT | AATAGTACAC | TCGTTTATCG | CGATGCACTT | ACTTGTA--- | -----      | ---GTGCGGT | TGTGCTGACG | TACTTGTGGT | GGTGTACTTA | 1400 |
| Metarhizium_robertsii_ARSEF_8070        | TAGTCTCAAT | AATAGTACAC | TCGTTTATCG | CGATGCACTT | ACTTGTA--- | -----      | ---GTGCGGT | TGTGCTGACG | TACTTGTGGT | GGTGTACTTA | 1400 |
| Metarhizium_robertsii_ARSEF_8685        | TAGTCTCAAT | AATAGTACAC | TCGTTTATCG | CGATGCACTT | ACTTGTA--- | -----      | ---GTGCGGT | TGTGCTGACG | TACTTGTGGT | GGTGTACTTA | 1400 |

|                                         |            |            |            |              |            |            |            |            |            |            |      |
|-----------------------------------------|------------|------------|------------|--------------|------------|------------|------------|------------|------------|------------|------|
| mani-IDF1                               | -----      | -----      | -----      | -----        | -----      | -----      | -----      | -----      | -----      | -----      | 1500 |
| mani-IDR1                               | -----      | -----      | -----      | -----        | -----      | -----      | -----      | -----      | -----      | -----      | 1500 |
| Metarhizium_anisopliae_TYPE_ARSEF_7487  | CTCTACAATA | GTGCTGGTAC | TTACGGTCGC | ACACAAATCC   | CTAGTATTTT | GGTGTAGTTG | TGATCGTGGT | GGTGCAGTTA | CAGCAGTGCA | CTTACCCTGT | 1500 |
| Metarhizium_anisopliae_ARSEF_1080       | CTCTACAATA | GTGCTGGTAC | TTACGGTCGC | ACACAAATCC   | CTAGTATTTT | GGTGTAGTTG | TGGTCGTGGT | GGTGCAGTTA | CACCAGTGCA | CTTACCCTGT | 1500 |
| Metarhizium_anisopliae_ARSEF_6347       | CTCTACAATA | GTGCTGGTAC | TTACGGTCGC | ACACAAATCC   | CTAGTATTTT | GGTGTAGTTG | TGGTCGTGGT | GGTGCAGTTA | CAGCAGTGCA | CTTACCCTGT | 1500 |
| Metarhizium_anisopliae_ARSEF_7450       | CTCTACAATA | GTGCTGGTAC | TTACGGTCGC | ACACAAATCC   | CTAGTATTTT | GGTGTAGTTG | TGATCGTGGT | GGTGCAGTTA | CAGCAGTGCA | CTTACCCTGT | 1500 |
| Metarhizium_anisopliae_ARSEF_798        | CTCTACAATA | GTGCTGGTAC | TTACGGTCGC | ACACAAATCC   | CTAGTATTTT | GGTGTAGTTG | TGGTCGTGGT | GGTGCAGTTA | CAGCAGTGCA | CTTACCCTGT | 1500 |
| Metarhizium_anisopliae_ART_2062         | CTCTACAATA | GTGCTGGTAC | TTACGGTCGC | ACACAAATCC   | CTAGTATTTT | GGTGTAGTTG | TGATCGTGGT | GGTGCAGTTA | CAGCAGTGCA | CTTACCCTGT | 1500 |
| mbru-IDF1                               | -----      | -----      | -----      | -----        | -----      | -----      | -----      | -----      | -----      | -----      | 1500 |
| mbru-IDR1                               | -----      | -----      | -----      | -----        | -----      | -----      | -----      | -----      | -----      | -----      | 1500 |
| Metarhizium_brunneum_TYPE_ARSEF_2107    | -----      | -----      | -----      | -----        | -----      | -----      | -----      | -----      | -----      | -----      | 1500 |
| Metarhizium_brunneum_ARSEF_1066         | -----      | -----      | -----      | -----        | -----      | -----      | -----      | -----      | -----      | -----      | 1500 |
| Metarhizium_brunneum_ARSEF_1278         | -----      | -----      | -----      | -----        | -----      | -----      | -----GTGGT | GGTGGAGTTA | CAGCAGTGCA | CTTACCCTGT | 1500 |
| Metarhizium_brunneum_ARSEF_3295         | -----      | -----      | -----      | -----        | -----      | -----      | -----      | -----      | -----      | -TTACCCTGT | 1500 |
| Metarhizium_brunneum_ARSEF_3826         | -----      | -----      | -----      | -----        | -----      | -----      | -----      | -----      | -----      | -----      | 1500 |
| Metarhizium_brunneum_ARSEF_4152         | CTCTACAATA | GTGCTGGTAC | TTGCGGTCAC | ATACAATTTT   | CCAGTATTTT | GGCGTAGTTG | TGGTCGTGGT | GGTGCAGTTA | CAGCAGTGCA | CTTACCCTGT | 1500 |
| Metarhizium_brunneum_ARSEF_4179         | CTCTACAATA | GTGCTGGTAC | TTGCGGTCAC | ATACAATTTT   | CCAGTATTTT | GGCGTAGTTG | TGGTCGTGGT | GGTGCAGTTA | CAGCAGTGCA | CTTACCCTGT | 1500 |
| Metarhizium_brunneum_ARSEF_5198         | -----      | -----      | -----      | -----        | -----      | -----      | -----      | -----      | -----      | -----      | 1500 |
| Metarhizium_brunneum_ARSEF_7524         | -----      | -----      | -----      | -----        | -----      | -----      | -----      | -----      | -----      | -----      | 1500 |
| Metarhizium_brunneum_ARSEF_988          | -----      | -----      | -----      | -----        | -----      | -----      | -----      | -----      | -----      | -TTACCCTGT | 1500 |
| Metarhizium_brunneum_ART_2825           | -----      | -----      | -----      | -----        | -----      | -----      | -----      | -----      | -----      | -TTACCCTGT | 1500 |
| mpin-IDF1                               | -----      | -----      | -----      | -----        | -----      | -----      | -----      | -----      | -----      | -----      | 1500 |
| mpin-IDR1                               | -----      | -----      | -----      | T ATACAAGTTC | CTAGTATTTT | GGC        | -----      | -----      | -----      | -----      | 1500 |
| Metarhizium_pingshaense_TYPE_CBS_257.90 | CTCTACAATA | GTGCTGGTAC | TTGCGGTCAT | ATACAAGTTC   | CTAGTATTTT | GGCGTAGTTG | TGGCCGTGGT | CGTGCAGTTA | CAGCAGTGTA | CTTACCCTGT | 1500 |
| Metarhizium_pingshaense_ARSEF_2809      | CTCTACAATA | GTGCTGGTAC | TTGCGGTCAT | ATACAAGTTC   | CTAGTATTTT | GGCGTAGTTG | TGGTCGTGGT | CGTGCAGTTA | CAGCAGTGTA | CTTACCCTGT | 1500 |
| Metarhizium_pingshaense_ARSEF_3210      | CTCTACAATA | GTGCTGGTAC | TTGCGGTCAT | ATACAAGTTC   | CTAGTATTTT | GGCGTAGTTG | TGGCCGTGGT | CGTGCAGTTA | CAGCAGTGTA | CTTACCCTGT | 1500 |
| Metarhizium_pingshaense_ARSEF_4342      | CTCTACAATA | GTGCTGGTAC | TTGCGGTCAT | ATACAAGTTC   | CTAGTATTTT | GGCGTAGTTG | TGGTCGTGGT | CGTGCAGTTA | CAGCAGTGTA | CTTACCCTGT | 1500 |
| Metarhizium_pingshaense_ARSEF_7422      | CTCTACAATA | GTGCTGGTAC | TTGCGGTCAT | ATACAAGTTC   | CTAGTATTTT | GGCGTAGTTG | TGGTCGTGGT | CGTGCAGTTA | CAGCAGTGTA | CTTACCCTGT | 1500 |
| Metarhizium_pingshaense_ARSEF_7929      | CTCTACAATA | GTGCTGGTAC | TTGCGGTCAT | ATACAAGTTC   | CTAGTATTTT | GGCGTAGTTG | TGGCCGTGGT | CGTGCAGTTA | CAGCAGTGTA | CTTACCCTGT | 1500 |
| mrob-IDF1                               | -----      | -----      | -----      | -----        | -----      | -----      | -----      | -----      | -----      | -----      | 1500 |
| mrob-IDR1                               | -----      | -----      | -----      | -----        | -----      | -----      | -----      | -----      | -----      | -----      | 1500 |
| Metarhizium_robertsii_TYPE_ARSEF_2575   | CTCTATAATA | GTGCTGGTAC | TTGCGGTCAC | ATACAAGTTC   | CTAGTATTTT | GGCGTAGTTG | TGGTCGTGGT | CGTGCAGTTA | CAGCAGTGCA | CTTACCCTGT | 1500 |
| Metarhizium_robertsii_ARSEF_6472        | CTCTATAATA | GTGCTGGTAC | TTGCGGTCAC | ATACAAGTTC   | CTAGTATTTT | GGCGTAGTTG | TGGTCGTGGT | CGTGCAGTTA | CAGCAGTGCA | CTTACCCTGT | 1500 |
| Metarhizium_robertsii_ARSEF_727         | CTCTATAATA | GTGCTGGTAC | TTGCGGTCAC | ATACAAGTTC   | CTAGTATTTT | GGCGTAGTTG | TGGTCGTGGT | CGTGCAGTTA | CAGCAGTGCA | CTTACCCTGT | 1500 |
| Metarhizium_robertsii_ARSEF_7501        | -----      | ----TGGTAC | TTGCGGTCAC | ATACAAGTTC   | CTAGTATTTT | GGCGTAGTTG | TGGTCGTGGT | CGTGCAGTTA | CAGCAGTGCA | CTTACCCTGT | 1500 |
| Metarhizium_robertsii_ARSEF_7532        | CTCTATAATA | GTGCTGGTAC | TTGCGGTCAC | ATACAAGTTC   | CTAGTATTTT | GGCGTAGTTG | TGGTCGTGGT | CGTGCAGTTA | CAGCAGTGCA | CTTACCCTGT | 1500 |
| Metarhizium_robertsii_ARSEF_8070        | CTCTATAATA | GTGCTGGTAC | TTGCGGTCAC | ATACAAGTTC   | CTAGTATTTT | GGCGTAGTTG | TGGTCGTGGT | CGTGCAGTTA | CAGCAGTGCA | CTTACCCTGT | 1500 |
| Metarhizium_robertsii_ARSEF_8685        | CTCTATAATA | GTGCTGGTAC | TTGCGGTCAC | ATACAAGTTC   | CTAGTATTTT | GGCGTAGTTG | TGGTCGTGGT | CGTGCAGTTA | CAGCAGTGCA | CTTACCCTGT | 1500 |





|                                         |            |            |            |            |            |            |            |            |            |            |      |
|-----------------------------------------|------------|------------|------------|------------|------------|------------|------------|------------|------------|------------|------|
| mani-IDR1                               |            |            |            |            |            |            |            |            |            |            | 1700 |
| Metarhizium_anisopliae_TYPE_ARSEF_7487  | TTTT-CAAAA | TCGACGACCA | AAAAGTTGGT | AGGTCTGGGT | TGCCTTGCTG | GCCAATAGAG | ATTTGTAT-- | -----A     | GGGTAGGCCG | GGGCAGGTAC | 1700 |
| Metarhizium_anisopliae_ARSEF_1080       | TTTT-CAAAA | TCGACGACCA | AAAAGTTGGT | AGGTCTGGGT | TGCCTTGCTG | GCCAATAGAG | ATTTGTATGG | CGCTACTATA | GGGTAGGCTG | -TGCCGGTAC | 1700 |
| Metarhizium_anisopliae_ARSEF_6347       | TTTT-CAAAA | TCGACGACCA | AAAAGTTGGT | AGGTCTGGGT | TGCCTTGCTG | GCCAATAGAG | ATTTGTATGG | CGCTACTATA | GGGTAGGCTG | -TGCCGGTAC | 1700 |
| Metarhizium_anisopliae_ARSEF_7450       | TTTT-CAAAA | TCGACGACCA | AAAAGTTGGT | AGGTCTGGGT | TGCCTTGCTG | GCCAATAGAG | ATTTGTAT-- | -----A     | GGGTAGGCCG | GGGCAGGTAC | 1700 |
| Metarhizium_anisopliae_ARSEF_798        | TTTT-CAAAA | TCGACGACCA | AAAAGTTGGT | AGGTCTGGGT | TGCCTTGCTG | GCCAATAGAG | ATTTGTATGG | CGCTACTATA | GGGTAGGCTG | -TGCCGGTAC | 1700 |
| Metarhizium_anisopliae_ART_2062         | TTTT-CAAAA | TCGACGACCA | AAAAGTTGGT | AGGTCTGGGT | TGCCTTGCTG | GCCAATAGAG | ATTTGTAT-- | -----A     | GGGTAGGCCG | GGGCAGGTAC | 1700 |
|                                         |            |            |            |            |            |            |            |            |            |            |      |
| mbru-IDF1                               |            |            |            |            |            |            |            |            |            |            | 1700 |
| mbru-IDR1                               |            |            |            |            |            |            |            |            |            |            | 1700 |
| Metarhizium_brunneum_TYPE_ARSEF_2107    | TTTT-CAAAA | TCGACGACCA | AAAGGTTGGC | AGGTCTGGGT | TGCCTTGCTG | GCCAATAGAG | ATTTGTACGG | CGCTACTATA | GGGTAGG--- |            | 1700 |
| Metarhizium_brunneum_ARSEF_1066         | TTTT-CAAAA | TCGACGACCA | AAAGGTTGGT | AGGTCTGGGT | TGCCTTGCTG | GCCAATAGAG | ATTTGTACGG | CGCTACTATA | GGGTAGG--- |            | 1700 |
| Metarhizium_brunneum_ARSEF_1278         | TTTT-CAAAA | TCGACGACCA | AAAGGTTGGT | AGGTCTGGGT | TGCCTTGCTG | GCCAATAGAG | ATTTGTACGG | CGCTACTATA | GGGTAGG--- |            | 1700 |
| Metarhizium_brunneum_ARSEF_3295         | TTTT-CAAAA | TCGACGACCA | AAAGGTTGGT | AGGTCTGGGT | TGCCTGGCCG | GCCAATAGAG | ATTTGTACGG | CGCTACTATA | GGGTAGG--- |            | 1700 |
| Metarhizium_brunneum_ARSEF_3826         | TTTT-CAAAA | TCGACGACCA | AAAGGTTGGT | AGGTCTGGGT | TGCCTTGCTG | GCCAATAGAG | ATTTGTACGG | CGCTACTATA | GGGTAGG--- |            | 1700 |
| Metarhizium_brunneum_ARSEF_4152         | TTTT-CAAAA | TCGACGACCA | AAAGGTTGGT | AGGTCTGGGT | TGCCTTGCTG | GCCAATAGAG | ATTTGTACGG | CGCTACTATA | GGGTAGG--- |            | 1700 |
| Metarhizium_brunneum_ARSEF_4179         | TTTT-CAAAA | TCGACGACCA | AAAGGTTGGT | AGGTCTGGGT | TGCCTTGCTG | GCCAATAGAG | ATTTGTACGG | CGCTACTATA | GGGTAGG--- |            | 1700 |
| Metarhizium_brunneum_ARSEF_5198         | TTTT-CAAAA | TCGACGACCA | AAAGGTTGGT | AGGTCTGGGT | TGCCTTGCTG | GCCAATAGAG | ATTTGTACGG | CGCTACTATA | GGGTAGG--- |            | 1700 |
| Metarhizium_brunneum_ARSEF_7524         | TTTT-CAAAA | TCGACGACCA | AAAGGTTGGT | AGGTCTGGGT | TGCCTTGCTG | GCCAATAGAG | ATTTGTACGG | CGCTACTATA | GGGTAGG--- |            | 1700 |
| Metarhizium_brunneum_ARSEF_988          | TTTT-CAAAA | TCGACGACCA | AAAGGTTGGT | AGGTCTGGGT | TGCCTGGCCG | GCCAATAGAG | ATTTGTACGG | CGCTACTATA | GGGTAGG--- |            | 1700 |
| Metarhizium_brunneum_ART_2825           | TTTT-CAAAA | TCGACGACCA | AAAGGTTGGT | AGGTCTGGGT | TGCCTTGCTG | GCCAATAGAG | ATTTGTACGG | CGCTACTATA | GGGTAGG--- |            | 1700 |
|                                         |            |            |            |            |            |            |            |            |            |            |      |
| mpin-IDF1                               |            |            |            |            |            |            |            |            |            |            | 1700 |
| mpin-IDR1                               |            |            |            |            |            |            |            |            |            |            | 1700 |
| Metarhizium_pingshaense_TYPE_CBS_257.90 | TTTT-CAAAA | TCGACGACCA | AAAAGTTGGT | AGGTCTGGGT | TGCCTTGCTG | GCCAATAGAG | ATTTGTATGG | CGCTACTATA | GGGTAGG--- |            | 1700 |
| Metarhizium_pingshaense_ARSEF_2809      | TTTT-CAAAA | TCGACGACCA | AAAAGTTGGT | AGGTCTGGGT | TGCCTTGCTG | GCCAATAGAG | ATTTGTATGG | CGCTACTATA | GGGTAGG--- |            | 1700 |
| Metarhizium_pingshaense_ARSEF_3210      | TTTT-CAAAA | TCGACGACCA | AAAAGTTGGT | AGGTCTGGGT | TGCCTTGCTG | GCCAATAGAG | ATTTGTATGG | CGCTACTATA | GGGTAGG--- |            | 1700 |
| Metarhizium_pingshaense_ARSEF_4342      | TTTT-CAAAA | TCGACGACCA | AAAAGTTGGT | AGGTCTGGGT | TGCCTTGCTG | GCCAATAGAG | ATTTGTATGG | CGCTACTATA | GGGTAGG--- |            | 1700 |
| Metarhizium_pingshaense_ARSEF_7422      | TTTT-CAAAA | TCGACGACCA | AAAAGTTGGT | AGGTCTGGGT | TGCCTTGCTG | GCCAATACAG | ATTTGTATGG | CGCTACTATA | GGGTAAG--- |            | 1700 |
| Metarhizium_pingshaense_ARSEF_7929      | TTTT-CAAAA | TCGACGACCA | AAAAGTTGGT | AGGTCTGGGT | TGCCTTGCTG | GCCAATAGAG | ATTTGTATGG | CGCTACTATA | GGGTAGG--- |            | 1700 |
|                                         |            |            |            |            |            |            |            |            |            |            |      |
| mrob-IDF1                               |            |            |            |            |            |            |            |            |            |            | 1700 |
| mrob-IDR1                               |            |            |            |            |            |            |            |            |            |            | 1700 |
| Metarhizium_robertsii_TYPE_ARSEF_2575   | TTTTTCAAAA | TCGACGACCA | AAAAGTTGGT | AGGTCTGGGT | TGCCTTGCTG | GCCAATAGAG | ATTTGTATGG | CGCTACTATA | GGGTAGG--- |            | 1700 |
| Metarhizium_robertsii_ARSEF_6472        | TTTTTCAAAA | TCGACGACCA | AAAAGTTGGT | AGGTCTGGGT | TGCCTTGCTG | GCCAATAGAG | ATTTGTATGG | CGCTACTATA | GGGTAGG--- |            | 1700 |
| Metarhizium_robertsii_ARSEF_727         | TTTTTCAAAA | TCGACGACCA | AAAAGTTGGT | AGGTCTGGGT | TGCCTTGCTG | GCCAATAGAG | ATTTGTATGG | CGCTACTATA | GGGTAGG--- |            | 1700 |
| Metarhizium_robertsii_ARSEF_7501        | TTTTTCAAAA | TCGACGACCA | AAAAGTTGGT | AGGTCTGGGT | TGCCTTGCTG | GCCAATAGAG | ATTTGTATGG | CGCTACTATA | GGGTAGG--- |            | 1700 |
| Metarhizium_robertsii_ARSEF_7532        | TTTTTCAAAA | TCGACGACCA | AAAAGTTGGT | AGGTCTGGGT | TGCCTTGCTG | GCCAATAGAG | ATTTGTATGG | CGCTACTATA | GGGTAGG--- |            | 1700 |
| Metarhizium_robertsii_ARSEF_8070        | TTTTTCAAAA | TCGACGACCA | AAAAGTTGGT | AGGTCTGGGT | TGCCTTGCTG | GCCAATACAG | ATTTGTATGG | CGCTACTATA | GGGTAGG--- |            | 1700 |
| Metarhizium_robertsii_ARSEF_8685        | TTTTTCAAAA | TCGACGACCA | AAAAGTTGGT | AGGTCTGGGT | TGCCTTGCTG | GCCAATAGAG | ATTTGTATGG | CGCTACTATA | GGGTAGG--- |            | 1700 |

|                                         |            |            |            |            |            |            |            |             |            |            |      |
|-----------------------------------------|------------|------------|------------|------------|------------|------------|------------|-------------|------------|------------|------|
| mani-IDF1                               | -----      | -----      | -----      | -----      | -----      | -----      | -----      | -----       | -----      | -----      | 1800 |
| mani-IDR1                               | -----      | -----      | -----      | -----      | -----      | -----      | -----      | -----       | -----      | -----      | 1800 |
| Metarhizium_anisopliae_TYPE_ARSEF_7487  | TTGCAGTCGC | ATACAAATTC | TCTAGTAATT | TGATGTACCT | CCGCGCGAAT | GGCAGTTTGG | CAGGGTAGGT | ACCGGGTAGG  | CTGGTGCAGG | TACTTGCACT | 1800 |
| Metarhizium_anisopliae_ARSEF_1080       | TTGCTGTCGC | ATACAAATTC | CCTAGTAACT | GGAAGTACCT | C-----     | -GCAGTTTGG | TAGGGCAGGT | ACCGGGTAGG  | CTG-TGCCCG | TACTTGCTGT | 1800 |
| Metarhizium_anisopliae_ARSEF_6347       | TTGCTGTCGC | ATACAAATTC | CCTAGTAACT | GGAAGTACCT | C-----     | -GCAGTTTGG | TAGGGCAGGT | ACCGGGTAGG  | CTG-TGCCCG | TACTTGCTGT | 1800 |
| Metarhizium_anisopliae_ARSEF_7450       | TTGCAGTCGC | ATACAAATTC | TCTAGTAATT | TGATGTACCT | CCGCGCGAAT | GGCAGTTTGG | CAGGGTAGGT | ACCGGGTAGG  | CTGGTGCAGG | TACTTGCACT | 1800 |
| Metarhizium_anisopliae_ARSEF_798        | TTGCTGTCGC | ATACAAATTC | CCTAGTAACT | GGAAGTACCT | C-----     | -GCAGTTTGG | TAGGGCAGGT | ACCGGGTAGG  | CTG-TGCCCG | TACTTGCTGT | 1800 |
| Metarhizium_anisopliae_ART_2062         | TTGCAGTCGC | ATACAAATTC | TCTAGTAATT | TGATGTACCT | CCGCGCGAAT | GGCAGTTTGG | CAGGGTAGGT | ACCGGGTAGG  | CTGGTGCAGG | TACTTGCACT | 1800 |
|                                         |            |            |            |            |            |            |            |             |            |            |      |
| mbru-IDF1                               | -----      | -----      | -----      | -----      | -----      | -----      | -----      | -----       | -----      | -----      | 1800 |
| mbru-IDR1                               | -----      | -----      | -----      | -----      | -----      | -----      | -----      | -----       | -----      | -----      | 1800 |
| Metarhizium_brunneum_TYPE_ARSEF_2107    | -----      | -----      | -----      | -----      | -----      | -----      | -----T     | ACAGGGTAGG  | CTG-TGCCCG | TACTTGCGGT | 1800 |
| Metarhizium_brunneum_ARSEF_1066         | -----      | -----      | -----      | -----      | -----      | -----      | -----T     | ACAGGGTAGG  | CTG-TGCCCG | TACTTGCGGT | 1800 |
| Metarhizium_brunneum_ARSEF_1278         | -----      | -----      | -----      | -----      | -----      | -----      | -----T     | ACAGGGTAGG  | CTG-TGCCCG | TACTTGCGGT | 1800 |
| Metarhizium_brunneum_ARSEF_3295         | -----      | -----      | -----      | -----      | -----      | -----      | -----T     | ACAGGGTAGG  | CTG-TGCCCG | TACTTGCGGT | 1800 |
| Metarhizium_brunneum_ARSEF_3826         | -----      | -----      | -----      | -----      | -----      | -----      | -----T     | ACAGGGTAGG  | CTG-TGTCGG | TACTTGCGGT | 1800 |
| Metarhizium_brunneum_ARSEF_4152         | -----      | -----      | -----      | -----      | -----      | -----      | -----T     | ACAGGGTAGG  | CTG-TGCCCG | TACTTGCGGT | 1800 |
| Metarhizium_brunneum_ARSEF_4179         | -----      | -----      | -----      | -----      | -----      | -----      | -----T     | ACAGGGTAGG  | CTG-TGCCCG | TACTTGCGGT | 1800 |
| Metarhizium_brunneum_ARSEF_5198         | -----      | -----      | -----      | -----      | -----      | -----      | -----T     | ACAGGGTAGG  | CTG-TGCCCG | TACTTGCGGT | 1800 |
| Metarhizium_brunneum_ARSEF_7524         | -----      | -----      | -----      | -----      | -----      | -----      | -----T     | ACAGGGTAGG  | CTG-TGCCCG | TACTTGCGGT | 1800 |
| Metarhizium_brunneum_ARSEF_988          | -----      | -----      | -----      | -----      | -----      | -----      | -----T     | ACAGGGTAGG  | CTG-TGCCCG | TACTTGCGGT | 1800 |
| Metarhizium_brunneum_ART_2825           | -----      | -----      | -----      | -----      | -----      | -----      | -----T     | ACAGGGTAGG  | CTG-TGCCCG | TACTTGCGGT | 1800 |
|                                         |            |            |            |            |            |            |            |             |            |            |      |
| mpin-IDF1                               | -----      | -----      | -----      | -----      | -----      | -----      | -----      | -----       | -----      | -----      | 1800 |
| mpin-IDR1                               | -----      | -----      | -----      | -----      | -----      | -----      | -----      | -----       | -----      | -----      | 1800 |
| Metarhizium_pingshaense_TYPE_CBS_257.90 | -----      | -----      | -----      | -----      | -----      | -----      | -----T     | ATAGGGTAGG  | CTG-TACCGG | TACTTGCGGT | 1800 |
| Metarhizium_pingshaense_ARSEF_2809      | -----      | -----      | -----      | -----      | -----      | -----      | -----T     | ACAGGGTAGG  | CTG-TACCGG | TACTTGCGGT | 1800 |
| Metarhizium_pingshaense_ARSEF_3210      | -----      | -----      | -----      | -----      | -----      | -----      | -----T     | ATAGGGTAGG  | CTG-TACCGG | TACTTGCGGT | 1800 |
| Metarhizium_pingshaense_ARSEF_4342      | -----      | -----      | -----      | -----      | -----      | -----      | -----T     | GATAGGGTAGG | CTG-TACCGG | TACTTGCGGT | 1800 |
| Metarhizium_pingshaense_ARSEF_7422      | -----      | -----      | -----      | -----      | -----      | -----      | -----C     | ATAGGGTAGG  | CTG-TACCGG | TACTTGCGGT | 1800 |
| Metarhizium_pingshaense_ARSEF_7929      | -----      | -----      | -----      | -----      | -----      | -----      | -----T     | ATAGGGTAGG  | CTG-TACCGG | TACTTGCGGT | 1800 |
|                                         |            |            |            |            |            |            |            |             |            |            |      |
| mrob-IDF1                               | -----      | -----      | -----      | -----      | -----      | -----      | -----      | -----       | -----      | -----      | 1800 |
| mrob-IDR1                               | -----      | -----      | -----      | -----      | -----      | -----      | -----      | -----       | -----      | -----      | 1800 |
| Metarhizium_robertsii_TYPE_ARSEF_2575   | -----      | -----      | -----      | -----      | -----      | -----      | -----T     | ATAGGGTAGG  | CTG-TGCCCG | TACTTGCGGT | 1800 |
| Metarhizium_robertsii_ARSEF_6472        | -----      | -----      | -----      | -----      | -----      | -----      | -----T     | ATAGGGTAGG  | CTG-TGCCCG | TACTTGCGGT | 1800 |
| Metarhizium_robertsii_ARSEF_727         | -----      | -----      | -----      | -----      | -----      | -----      | -----T     | ATAGGGTAGG  | CTG-TGCCCG | TACTTGCGGT | 1800 |
| Metarhizium_robertsii_ARSEF_7501        | -----      | -----      | -----      | -----      | -----      | -----      | -----T     | ATAGGGTAGG  | CTG-TGCCCG | TACTTGCGGT | 1800 |
| Metarhizium_robertsii_ARSEF_7532        | -----      | -----      | -----      | -----      | -----      | -----      | -----T     | ATAGGGTAGG  | CTG-TGCCCG | TACTTGCGGT | 1800 |
| Metarhizium_robertsii_ARSEF_8070        | -----      | -----      | -----      | -----      | -----      | -----      | -----T     | ATAGGGTAGG  | CTG-TGCCCG | TACTTGCGGT | 1800 |
| Metarhizium_robertsii_ARSEF_8685        | -----      | -----      | -----      | -----      | -----      | -----      | -----T     | ATAGGGTAGG  | CTG-TGCCCG | TACTTGCGGT | 1800 |

|                                         |            |            |            |            |            |      |
|-----------------------------------------|------------|------------|------------|------------|------------|------|
| mani-IDF1                               | -----      | -----      | -----      | -----      | -----      | 1850 |
| mani-IDR1                               | -----      | -----      | -----      | -----      | -----      | 1850 |
| Metarhizium_anisopliae_TYPE_ARSEF_7487  | TGCATACAAA | TTCTCTAGTA | ACTGGAAGTA | CCCCCGCGCG | CGGGCAACTT | 1850 |
| Metarhizium_anisopliae_ARSEF_1080       | CGCATACAAA | TTCCCTAGTA | ACTGGAAGTA | CCCCCGCGCG | CGGGCAACTT | 1850 |
| Metarhizium_anisopliae_ARSEF_6347       | CGCATACAAA | TTCCCTAGTA | ACTGGAAGTA | CCCCCGCGCG | CGGGCAACTT | 1850 |
| Metarhizium_anisopliae_ARSEF_7450       | TGCATACAAA | TTCTCTAGTA | ACTGGAAGTA | CCCCCGCGCG | CGGGCAACTT | 1850 |
| Metarhizium_anisopliae_ARSEF_798        | CGCATACAAA | TTCCCTAGTA | ACTGGAAGTA | CCCCCGCGCG | CGGGCAACTT | 1850 |
| Metarhizium_anisopliae_ART_2062         | TGCATACAAA | TTCTCTAGTA | ACTGGAAGTA | CCCCCGCGCG | CGGGCAACTT | 1850 |
| mbru-IDF1                               | -----      | -----      | -----      | -----      | -----      | 1850 |
| mbru-IDR1                               | -----      | -----      | -----      | -----      | -----      | 1850 |
| Metarhizium_brunneum_TYPE_ARSEF_2107    | CGCACACAAA | T-CCCTAGCA | GCCTGAAGTA | CCCCCGCGCG | CGGGCAACTT | 1850 |
| Metarhizium_brunneum_ARSEF_1066         | CGCACACAAA | T-CCCTAGCA | GCCTGAAGTA | CCCCCGCGCG | CGGGCAACTT | 1850 |
| Metarhizium_brunneum_ARSEF_1278         | CGCACACAAA | T-CCCTAGCA | GCCTGAAGTA | CCCCCGCGCG | CGGGCAAGTT | 1850 |
| Metarhizium_brunneum_ARSEF_3295         | CGCACACAAA | T-CCCTAGCA | GCCTGAAGTA | CCCCCGCGCG | CGGGCAGCTT | 1850 |
| Metarhizium_brunneum_ARSEF_3826         | CGCACACAAA | T-CCCTAGCA | GCCTGAAGTA | CCCCCGCGCG | CGGGCAACTT | 1850 |
| Metarhizium_brunneum_ARSEF_4152         | CGCACACAAA | T-CCCTAGCA | GCCTGAAGTA | CCCCCGCGCG | CGGGCAGCTT | 1850 |
| Metarhizium_brunneum_ARSEF_4179         | CGCACACAAA | T-CCCTAGCA | GCCTGAAGTA | CCCCCGCGCG | CGGGCAGCTT | 1850 |
| Metarhizium_brunneum_ARSEF_5198         | CGCACACAAA | T-CCCTAGCA | GCCTGAAGTA | CCCCCGCGCG | CGGGCAACTT | 1850 |
| Metarhizium_brunneum_ARSEF_7524         | CGCACACAAA | T-CCCTAGCA | GCCTGAAGTA | CCCCCGCGCG | CGGGCAACTT | 1850 |
| Metarhizium_brunneum_ARSEF_988          | CGCACACAAA | T-CCCTAGCA | GCCTGAAGTA | CCCCCGCGCG | CGGGCAGCTT | 1850 |
| Metarhizium_brunneum_ART_2825           | CGCACACAAA | T-CCCTAGCA | GCCTGAAGTA | CCCCCGCGC- | -GGGCAGCCT | 1850 |
| mpin-IDF1                               | -----      | -----      | -----      | -----      | -----      | 1850 |
| mpin-IDR1                               | -----      | -----      | -----      | -----      | -----      | 1850 |
| Metarhizium_pingshaense_TYPE_CBS_257.90 | CGCACACAAA | T-CCCTAGCA | GCCTGGAGTA | CCCCCGCGCG | CGGGCAACTT | 1850 |
| Metarhizium_pingshaense_ARSEF_2809      | CGCACACAAA | T-CCCTAGCA | GCCTGGAGTA | CCCCCGCGCG | CGGGCAACTT | 1850 |
| Metarhizium_pingshaense_ARSEF_3210      | CGCACACAAA | T-CCCTAGCA | GCCTGGAGTA | CCCCCGCGCG | CGGGCAACTT | 1850 |
| Metarhizium_pingshaense_ARSEF_4342      | CGCACACAAA | T-CCCTAGCA | GCCTGGAGTA | CCCCCGCGCG | CGGGCAACTT | 1850 |
| Metarhizium_pingshaense_ARSEF_7422      | CGCACACAAA | T-CCCTAGCA | GCCTGGAGTA | CCCCCGCGCG | CGGGCAACTT | 1850 |
| Metarhizium_pingshaense_ARSEF_7929      | CGCACACAAA | T-CCCTAGCA | GCCTGGAGTA | CCCCCGCGCG | CGGGCAACTT | 1850 |
| mrob-IDF1                               | -----      | -----      | -----      | -----      | -----      | 1850 |
| mrob-IDR1                               | -----      | -----      | -----      | -----      | -----      | 1850 |
| Metarhizium_robertsii_TYPE_ARSEF_2575   | CGCACACAAA | T-CCCTAGCA | GCCTGAAGTA | CCCCCGCGCG | CGGGCAACTT | 1850 |
| Metarhizium_robertsii_ARSEF_6472        | CGCACACAAA | T-CCCTAGCA | GCCTGAAGTA | CCCCCGCGCG | CGGGCAACTT | 1850 |
| Metarhizium_robertsii_ARSEF_727         | CGCACACAAA | T-CCCTAGCA | GCCTGAAGTA | CCCCCGCGCG | CGGGCAACTT | 1850 |
| Metarhizium_robertsii_ARSEF_7501        | CGCACACAAA | T-CCCTAGCA | GCCTGAAGTA | CCCCCGCGCG | CGGGCAACTT | 1850 |
| Metarhizium_robertsii_ARSEF_7532        | CGCACACAAA | T-CCCTAGCA | GCCTGAAGTA | CCCCCGCGCG | CGGGCAACTT | 1850 |
| Metarhizium_robertsii_ARSEF_8070        | CGCACACAAA | T-CCCTAGCA | GCCTGAAGTA | CCCCCGCGCG | CGGGCAACTT | 1850 |
| Metarhizium_robertsii_ARSEF_8685        | CGCACACAAA | T-CCCTAGCA | GCCTGAAGTA | CCCCCGCGCG | CGGGCAACTT | 1850 |

**Supplementary Figure S6.** Alignment of ribosomal intergenic spacer (rIGS) sequences used for diagnostic primer design. Diagnostic primer pairs are indicated by colors: mani-IDF1/R1 (blue), mbru-IDF1/R1 (green), mpin-IDF1/R1 (red), mrob-IDF1/R1 (yellow).
