# Supplementary material for: Species Discrimination within the Metarhizium PARB Clade: Ribosomal Intergenic Spacer (rIGS)-Based Diagnostic PCR and Single Marker Taxonomy
Source: MDPI journal article supplement (doi:10.3390/jof9100996), 2023-10-08
Supplement: s1 [file s1]

**Suppl Table S3.** Preparative PCR primers used and reaction-specific parameters applied in this study.

| Primer Designation | Primer Sequence (5' => 3') | Annealing Temperature (°C) | Elongation Time (sec) | References |
|--------------------|----------------------------|----------------------------|-----------------------|------------|
| EF1T               | ATGGGTAAGGARGACAAGAC       | 64                         | 60                    | [29]       |
| EF2T               | GGAAGTACCAGTGATCATGTT      |                            |                       |            |
| EF1A-983F          | GCYCCYGGHCAYCGTGAYTTYAT    | 52                         | 90                    | [53]       |
| EF1A-2218R         | ATGACACCRACRGCRACRGTYTG    |                            |                       |            |
| EF1A-1567R         | ACHGTRCCRATACCACCSATCTT    | sequencing primer          |                       | [53]       |
| EF1A-1577F         | CARGAYGTBTACAAGATYGGTGG    | sequencing primer          |                       | [6]        |
| RPB1Af             | GARTGYCCDGGDCAYTTYGG       | 50                         | 90                    | [54]       |
| RPB1Cr             | CCNGCDATNTCRTRTCCATRTA     |                            |                       |            |
| RPB2-5f            | GAYGAYMGWGATCAYTTYGG       | 50                         | 120                   | [52]       |
| RPB2-7r            | CCCATRGCTTGYYTTRCCCAT      |                            |                       |            |
| RPB2-6f            | TGGGGKWTGGTYTGYCCTGC       | sequencing primer          |                       | [51]       |
| RPB2-6r            | GCAGGRCARACCAWMCCCCA       | sequencing primer          |                       |            |
| Migs1-F1           | CCTTGTTGTTACGATCTGCTGAG    | 55                         | 90                    | this study |
| Migs850-R1         | TAAASAAGCAGCCTACCCTAAAGC   |                            |                       | this study |
| Migs1-F2           | CTGAGGGTTAGCCGTTCTTCG      | 64                         | 120                   | this study |
| Migs 1200R         | CCAGCAGAGAAATCCCCTCAC      |                            |                       | this study |
| Migs 1100F         | AGAGRGAGGGCTGGACACGCG      | 64                         | 120                   | this study |
| Migs 2000R         | GGCTCAATCGATGCAGCTCGGCGAG  |                            |                       | this study |
