# Supplementary material for: Species Discrimination within the Metarhizium PARB Clade: Ribosomal Intergenic Spacer (rIGS)-Based Diagnostic PCR and Single Marker Taxonomy
Source: MDPI journal article supplement (doi:10.3390/jof9100996), 2023-10-08
Supplement: s1 [file s1]

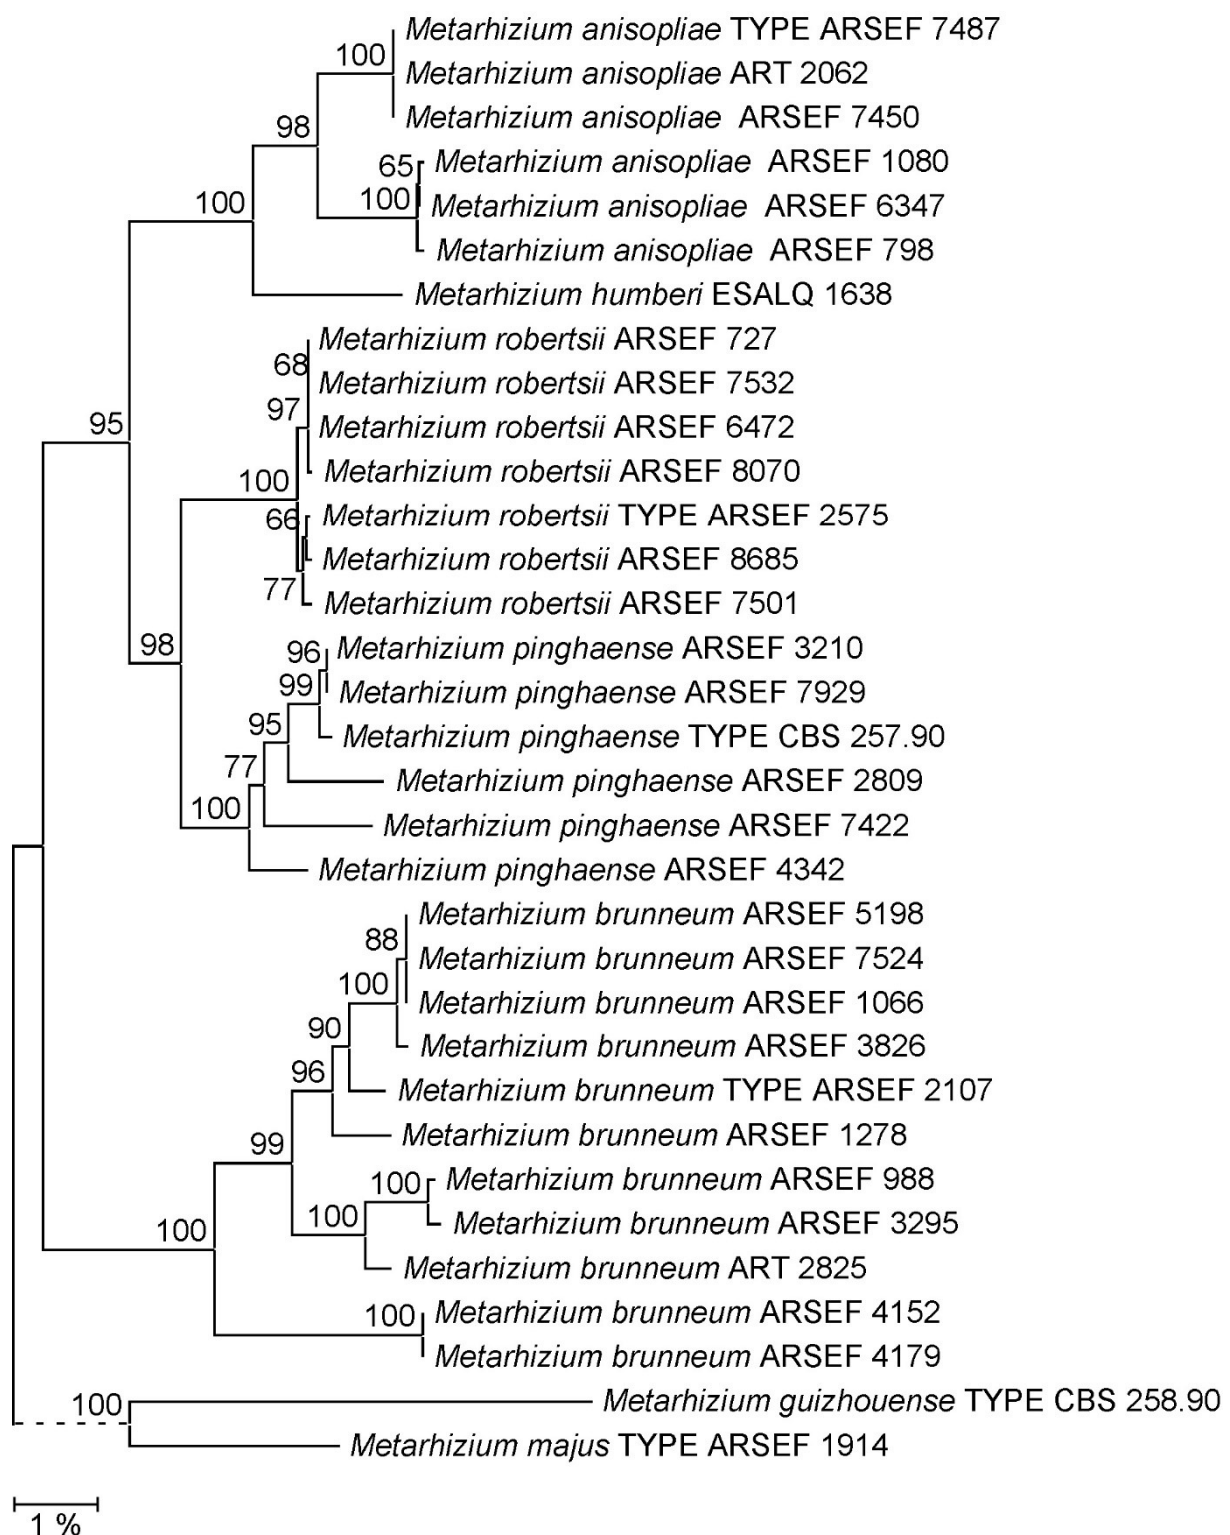

**Supplementary Figure S5.** Neighbor-Joining (NJ) phylogeny of *Metarhizium* fungi as reconstructed from rIGS sequences. Terminal branches are labelled by genus, species and strain designations; “TYPE” denotes the nomenclatural type strain of a species. Numbers on branches indicate bootstrap support percentages. The size bar corresponds to 1 % sequence divergence; branches drawn as dashed lines are not to

scale. The rIGS sequences from the *M. majus* and *M. guizhouense* type strains have been jointly used as outgroup.
