# Supplementary material for: Species Discrimination within the Metarhizium PARB Clade: Ribosomal Intergenic Spacer (rIGS)-Based Diagnostic PCR and Single Marker Taxonomy
Source: MDPI journal article supplement (doi:10.3390/jof9100996), 2023-10-08
Supplement: s1 [file s1]

**Suppl. Table S2.** Validation data set of *Metarhizium* strains and marker sequences. "M." abbreviates "Metarhizium".

| Strain / Isolate | Previous Identification            | Identification by    |                      |                      | 5TEF     | rIGS-ID800 | Geographic Origin                              | Original Host, Isolation Source                  | References       |
|------------------|------------------------------------|----------------------|----------------------|----------------------|----------|------------|------------------------------------------------|--------------------------------------------------|------------------|
|                  |                                    | diagnostic PCR       | rIGS-ID800           | 5TEF                 |          |            |                                                |                                                  |                  |
| ARSEF 2080       | <i>M. anisopliae sensu stricto</i> | <i>M. anisopliae</i> | <i>M. anisopliae</i> | <i>M. anisopliae</i> | KX342700 | OR400501   | Indonesia                                      | <i>Nilaparvata lugens</i>                        | [36], this study |
| ARSEF 2231       | <i>M. pinghaense</i>               | <i>M. pinghaense</i> | <i>M. pinghaense</i> | <i>M. pinghaense</i> | KX342723 | OR400502   | India                                          | <i>Zygogramma bicolorata</i>                     | [36], this study |
| ARSEF 3180       | <i>M. pinghaense</i>               | <i>M. pinghaense</i> | <i>M. pinghaense</i> | <i>M. pinghaense</i> | KX342704 | OR400503   | Philippines                                    | Soil                                             | [36], this study |
| ARSEF 3604       | <i>M. pinghaense</i>               | <i>M. pinghaense</i> | <i>M. pinghaense</i> | <i>M. pinghaense</i> | KX342708 | OR400504   | Papua New Guinea                               | <i>Scapanes australis</i>                        | [36], this study |
| ARSEF 4290       | <i>M. pinghaense</i>               | <i>M. pinghaense</i> | <i>M. pinghaense</i> | <i>M. pinghaense</i> | KX342705 | OR400505   | Solomon Islands                                | Coleoptera                                       | [36], this study |
| ARSEF 5625       | <i>M. brunneum</i>                 | <i>M. brunneum</i>   | <i>M. brunneum</i>   | <i>M. brunneum</i>   | KX342765 | OR400506   | Finland                                        | Soil                                             | [36], this study |
| ARSEF 8680       | <i>M. anisopliae sensu lato</i>    | <i>M. brunneum</i>   | <i>M. brunneum</i>   | <i>M. brunneum</i>   | FJ229493 | OR400507   | Canada                                         | Soil                                             | [24], this study |
| ARSEF 9975       | <i>Metarhizium sp.</i>             | <i>M. pinghaense</i> | <i>M. pinghaense</i> | <i>M. pinghaense</i> | MK156097 | OR400508   | U.S.A.                                         | Soil                                             | [50], this study |
| CEPAVE CEP 005   | <i>M. anisopliae sensu lato</i>    | <i>M. brunneum</i>   | <i>M. brunneum</i>   | <i>M. brunneum</i>   | OR441043 | OR441065   | Argentina, Buenos Aires, Berisso               | <i>Aedes crinifer</i> [Diptera: Culicidae]       | this study       |
| CEPAVE CEP 076   | <i>M. anisopliae sensu lato</i>    | <i>M. anisopliae</i> | <i>M. anisopliae</i> | <i>M. anisopliae</i> | OR441044 | OR441066   | Argentina, Buenos Aires, Los Hornos            | <i>Kanaima fluvialis</i> [Hemiptera: Cercopidae] | this study       |
| CEPAVE CEP 120   | <i>M. anisopliae sensu lato</i>    | <i>M. anisopliae</i> | <i>M. anisopliae</i> | <i>M. anisopliae</i> | OR441045 | OR441067   | Argentina, Buenos Aires, Abasto                | <i>Kanaima fluvialis</i> [Hemiptera: Cercopidae] | this study       |
| CEPAVE CEP 392   | <i>M. anisopliae sensu lato</i>    | <i>M. robertsii</i>  | <i>M. robertsii</i>  | <i>M. robertsii</i>  | OR441046 | OR441068   | Argentina, San Juan, Est. Exp. P               | Soil                                             | this study       |
| CEPAVE CEP 423   | <i>M. anisopliae sensu lato</i>    | <i>M. robertsii</i>  | <i>M. robertsii</i>  | <i>M. robertsii</i>  | OR441047 | OR441069   | Argentina, La Plata                            | Soil                                             | this study       |
| CEPAVE CEP 587   | <i>M. anisopliae sensu lato</i>    | <i>M. robertsii</i>  | <i>M. robertsii</i>  | <i>M. robertsii</i>  | OR441048 | OR441070   | Argentina, Buenos Aires, Parque Pereyra Iraola | Soil                                             | this study       |
| CEPAVE CEP 615   | <i>M. anisopliae sensu lato</i>    | <i>M. robertsii</i>  | <i>M. robertsii</i>  | <i>M. robertsii</i>  | OR441049 | OR441071   | Argentina                                      | Soil                                             | this study       |

|                |                                 |                      |                      |                      |          |          |                                              |                                                     |                 |
|----------------|---------------------------------|----------------------|----------------------|----------------------|----------|----------|----------------------------------------------|-----------------------------------------------------|-----------------|
| CEPAVE CEP 683 | <i>M. anisopliae sensu lato</i> | <i>M. robertsii</i>  | <i>M. robertsii</i>  | <i>M. robertsii</i>  | OR441050 | OR441072 | Argentina, La Plata, Est. Exp. J. Hirschhorn | Soil                                                | this study      |
| CEPAVE CEP 773 | <i>M. anisopliae sensu lato</i> | <i>M. brunneum</i>   | <i>M. brunneum</i>   | <i>M. brunneum</i>   | OR441051 | OR441073 | Argentina, Salta, Piedra del Molino          | Soil                                                | this study      |
| INISAV LBM-5   | <i>M. anisopliae</i>            | <i>M. anisopliae</i> | <i>M. anisopliae</i> | <i>M. anisopliae</i> | MZ329397 | OR441058 | Cuba                                         | undetermined Hemipteran insect                      | [6], this study |
| INISAV LBM-7   | <i>M. anisopliae sensu lato</i> | <i>M. robertsii</i>  | <i>M. robertsii</i>  | <i>M. robertsii</i>  | OR423400 | OR441059 | Cuba                                         | undetermined Homopteran insect                      | this study      |
| INISAV LBM-10  | <i>M. anisopliae</i>            | <i>M. anisopliae</i> | <i>M. anisopliae</i> | <i>M. anisopliae</i> | MZ329398 | OR441060 | Cuba                                         | undetermined Hemipteran insect                      | [6], this study |
| INISAV LBM-11  | <i>M. anisopliae</i>            | <i>M. anisopliae</i> | <i>M. anisopliae</i> | <i>M. anisopliae</i> | MZ329399 | OR441061 | Cuba, Havana                                 | <i>Mocis latipes</i> (Lepidoptera: Erebidiae)       | [6], this study |
| INISAV LBM-12  | <i>M. anisopliae</i>            | <i>M. anisopliae</i> | <i>M. anisopliae</i> | <i>M. anisopliae</i> | MZ329400 | OR441062 | Cuba                                         | <i>Corcyra cephalonica</i> (Lepidoptera: Pyralidae) | [6], this study |
| INISAV LBM-146 | <i>M. robertsii</i>             | <i>M. robertsii</i>  | <i>M. robertsii</i>  | <i>M. robertsii</i>  | MZ329401 | OR441063 | Cuba                                         | Leaf hopper (Hemiptera: Cicadellidae)               | [6], this study |
| INISAV LBM-267 | <i>M. anisopliae</i>            | <i>M. anisopliae</i> | <i>M. anisopliae</i> | <i>M. anisopliae</i> | MZ329402 | OR441064 | Cuba                                         | Leaf hopper (Hemiptera: Cicadellidae)               | [6], this study |
| KTMU M-01      | <i>M. anisopliae sensu lato</i> | <i>M. robertsii</i>  | <i>M. robertsii</i>  | <i>M. robertsii</i>  | OR441052 | OR441074 | Kyrgyzstan, Chemche village                  | Soil                                                | this study      |
| KTMU M-04      | <i>M. anisopliae sensu lato</i> | <i>M. robertsii</i>  | <i>M. robertsii</i>  | <i>M. robertsii</i>  | OR441053 | OR441053 | Kyrgyzstan, Syrt village                     | Soil                                                | this study      |
| KTMU M-05      | <i>M. anisopliae sensu lato</i> | <i>M. robertsii</i>  | <i>M. robertsii</i>  | <i>M. robertsii</i>  | OR441054 | OR441076 | Kyrgyzstan, Molo village                     | Soil                                                | this study      |
| KTMU M-07      | <i>M. anisopliae sensu lato</i> | <i>M. robertsii</i>  | <i>M. robertsii</i>  | <i>M. robertsii</i>  | OR441055 | OR441077 | Kyrgyzstan, Zhetigen village                 | Soil                                                | this study      |
| KTMU M-13      | <i>M. anisopliae sensu lato</i> | <i>M. robertsii</i>  | <i>M. robertsii</i>  | <i>M. robertsii</i>  | OR441056 | OR441078 | Kyrgyzstan, Krugowoi                         | Soil                                                | this study      |
| KTMU M-15      | <i>M. anisopliae sensu lato</i> | <i>M. robertsii</i>  | <i>M. robertsii</i>  | <i>M. robertsii</i>  | OR441057 | OR441079 | Kyrgyzstan, Kolmo village                    | Soil                                                | this study      |
