# Supplementary material for: Species Discrimination within the Metarhizium PARB Clade: Ribosomal Intergenic Spacer (rIGS)-Based Diagnostic PCR and Single Marker Taxonomy
Source: MDPI journal article supplement (doi:10.3390/jof9100996), 2023-10-08
Supplement: s1 [file s1]

**Suppl. Table S1.** Reference data set of *Metarhizium* strains and marker sequences used for diagnostic PCR development. “-T” following a strain designation denotes a nomenclatural type strain.

| Strain Designation | Genus, Species                | rIGS     | 5TEF     | EF1A     | RPB1     | RPB2     | Geographic Origin | Original Host, Isolation Source | References          |
|--------------------|-------------------------------|----------|----------|----------|----------|----------|-------------------|---------------------------------|---------------------|
| ARSEF 7486 - T     | <i>Metarhizium acridum</i>    | NA       | EU248845 | EU248845 | EU248897 | EU248925 | Niger             | Orthoptera                      | [24]                |
| ARSEF 798          | <i>Metarhizium anisopliae</i> | OR296677 | KX342696 | OR296642 | OR296653 | OR296664 | Colombia          | <i>Aeneolamia varia</i>         | [36], this study    |
| ARSEF 1080         | <i>Metarhizium anisopliae</i> | OR296678 | KX342698 | OR296643 | OR296654 | OR296665 | USA               | <i>Helicoverpa zea</i>          | [36], this study    |
| ARSEF 6347         | <i>Metarhizium anisopliae</i> | MH604976 | EU248881 | OR296644 | OR296655 | OR296666 | Colombia          | <i>Hemiptera</i>                | [24,37], this study |
| ARSEF 7450         | <i>Metarhizium anisopliae</i> | MH604977 | EU248852 | EU248852 | EU248904 | EU248932 | Australia         | Coleoptera                      | [24,37]             |
| ARSEF 7487 - T     | <i>Metarhizium anisopliae</i> | MH604974 | DQ463996 | DQ463996 | DQ468355 | DQ468370 | Ethiopia          | Orthoptera                      | [29,37]             |
| ART 2062           | <i>Metarhizium anisopliae</i> | MH604975 | NA       | NA       | NA       | NA       | India             | NA                              | [37]                |
| ARSEF 988          | <i>Metarhizium brunneum</i>   | MH604982 | KX342758 | EU248890 | NA       | NA       | Japan             | <i>Bombyx mori</i>              | [24,36,37]          |
| ARSEF 1066         | <i>Metarhizium brunneum</i>   | OR296679 | KX342763 | OR296645 | OR296656 | OR296667 | Switzerland       | <i>Melolontha melolontha</i>    | [36], this study    |
| ARSEF 1278         | <i>Metarhizium brunneum</i>   | OR296680 | KX342772 | OR296646 | OR296657 | OR296668 | Canada            | soil                            | [36], this study    |
| ARSEF 2107 - T     | <i>Metarhizium brunneum</i>   | MH604983 | EU248855 | EU248855 | EU248907 | EU248935 | USA               | Coleoptera                      | [24,37]             |
| ARSEF 3295         | <i>Metarhizium brunneum</i>   | OR296681 | KX342759 | OR296647 | OR296658 | OR296669 | Mexico            | <i>Anticarsia gemmatalis</i>    | [36], this study    |

|                |                                |                    |          |                    |                    |                    |                 |                                 |                     |
|----------------|--------------------------------|--------------------|----------|--------------------|--------------------|--------------------|-----------------|---------------------------------|---------------------|
| ARSEF 3826     | <i>Metarhizium brunneum</i>    | MH604984           | KX342769 | OR296648           | OR296659           | OR296670           | USA             | <i>Ochlerotatus triseriatus</i> | [36,37], this study |
| ARSEF 4152     | <i>Metarhizium brunneum</i>    | MH604984           | KX342757 | EU248853           | EU248905           | EU248933           | Australia       | soil                            | [24,36,37]          |
| ARSEF 4179     | <i>Metarhizium brunneum</i>    | MH604986           | EU248854 | EU248854           | EU248906           | EU248934           | Australia       | soil                            | [24,37]             |
| ARSEF 5198     | <i>Metarhizium brunneum</i>    | MH604987           | EU248876 | NA                 | NA                 | NA                 | Germany         | Coleoptera                      | [24,37]             |
| ARSEF 7524     | <i>Metarhizium brunneum</i>    | MH604988           | NA       | NA                 | NA                 | NA                 | Switzerland     | <i>Agriotes sp.</i> larva       | [37]                |
| ART 2825       | <i>Metarhizium brunneum</i>    | MH604989           | NA       | KR706488           | NA                 | NA                 | Switzerland     | <i>Agriotes obscurus</i>        | [37,48]             |
| CBS 258.90 - T | <i>Metarhizium guizhouense</i> | MH604996           | EU248862 | EU248862           | EU248914           | EU248942           | China           | Lepidoptera                     | [24,37], this study |
| ESALQ 1638     | <i>Metarhizium humberi</i>     | JACEFI010 000005.1 | KP027955 | JACEFI010 000008.1 | JACEFI010 000006.1 | JACEFI010 000009.1 | Brazil          | soil                            | [34]                |
| IP 1           | <i>Metarhizium humberi</i>     | NA                 | JQ061188 | MH837571           | MH837553           | MH837562           | Brazil          | soil                            | [35,49]             |
| IP 46 - T      | <i>Metarhizium humberi</i>     | NA                 | JQ061205 | MH837574           | MH837556           | MH837565           | Brazil          | soil                            | [35,49]             |
| IP 86          | <i>Metarhizium humberi</i>     | NA                 | JQ061186 | MH837576           | MH837558           | MH837567           | Brazil          | soil                            | [35,49]             |
| IP 151         | <i>Metarhizium humberi</i>     | NA                 | JQ061208 | MH837579           | MH837561           | MH837570           | Brazil          | soil                            | [49]                |
| ARSEF 1914 - T | <i>Metarhizium majus</i>       | MH604993           | EU248868 | EU248868           | EU248920           | EU248948           | Phillipines     | Coleoptera                      | [24,37]             |
| ARSEF 2809     | <i>Metarhizium pinghaense</i>  | OR296682           | KX342712 | OR296649           | OR296660           | OR296671           | Philippines     | soil                            | [36], this study    |
| ARSEF 3210     | <i>Metarhizium pinghaense</i>  | MH604981           | DQ463995 | DQ463995           | DQ468354           | DQ468369           | India           | Coleoptera                      | [29,37]             |
| ARSEF 4342     | <i>Metarhizium pinghaense</i>  | MH604980           | EU248851 | EU248851           | EU248903           | EU248931           | Solomon Islands | Coleoptera                      | [24,37]             |

|                |                               |          |          |                    |                    |                    |             |                                                    |                     |
|----------------|-------------------------------|----------|----------|--------------------|--------------------|--------------------|-------------|----------------------------------------------------|---------------------|
| ARSEF 7422     | <i>Metarhizium pinghaense</i> | OR296683 | KX342706 | OR296650           | OR296661           | OR296672           | Australia   | Coleoptera                                         | [36], this study    |
| ARSEF 7929     | <i>Metarhizium pinghaense</i> | MH604979 | EU248847 | EU248847           | EU248899           | OR296675           | Australia   | Isoptera                                           | [24,37], this study |
| CBS 257.90 - T | <i>Metarhizium pinghaense</i> | MH604978 | EU248850 | EU248850           | EU248902           | OR296676           | China       | Coleoptera                                         | [24,37], this study |
| ARSEF 727      | <i>Metarhizium robertsii</i>  | MH604970 | DQ463994 | DQ463994           | DQ468353           | DQ468368           | Brazil      | Orthoptera                                         | [29,37]             |
| ARSEF 2575 - T | <i>Metarhizium robertsii</i>  | MH604971 | KX342729 | JELW0100<br>0003.1 | JELW0100<br>0006.1 | JELW0100<br>0009.1 | USA         | <i>Curculio caryae</i>                             | [36,37]             |
| ARSEF 6472     | <i>Metarhizium robertsii</i>  | MH604972 | KX342740 | EU248884           | NA                 | NA                 | USA         | <i>Dectes texanus</i>                              | [24,36,37]          |
| ARSEF 7501     | <i>Metarhizium robertsii</i>  | MH604973 | KX342741 | EU248849           | EU248901           | EU248929           | Australia   | Coleoptera                                         | [24,36,37]          |
| ARSEF 7532     | <i>Metarhizium robertsii</i>  | MH604969 | NA       | NA                 | NA                 | NA                 | Switzerland | <i>Melolontha melolontha</i>                       | [37]                |
| ARSEF 8070     | <i>Metarhizium robertsii</i>  | OR296684 | KX342750 | OR296651           | OR296662           | OR296673           | Australia   | mound material of<br><i>Nasutitermes exitiosus</i> | [36], this study    |
| ARSEF 8685     | <i>Metarhizium robertsii</i>  | OR296685 | FJ229494 | OR296652           | OR296663           | OR296674           | Canada      | Soil                                               | [24], this study    |
