# Supplementary material for: Species Discrimination within the Metarhizium PARB Clade: Ribosomal Intergenic Spacer (rIGS)-Based Diagnostic PCR and Single Marker Taxonomy
Source: MDPI journal article supplement (doi:10.3390/jof9100996), 2023-10-08
Supplement: s1 [file s1]

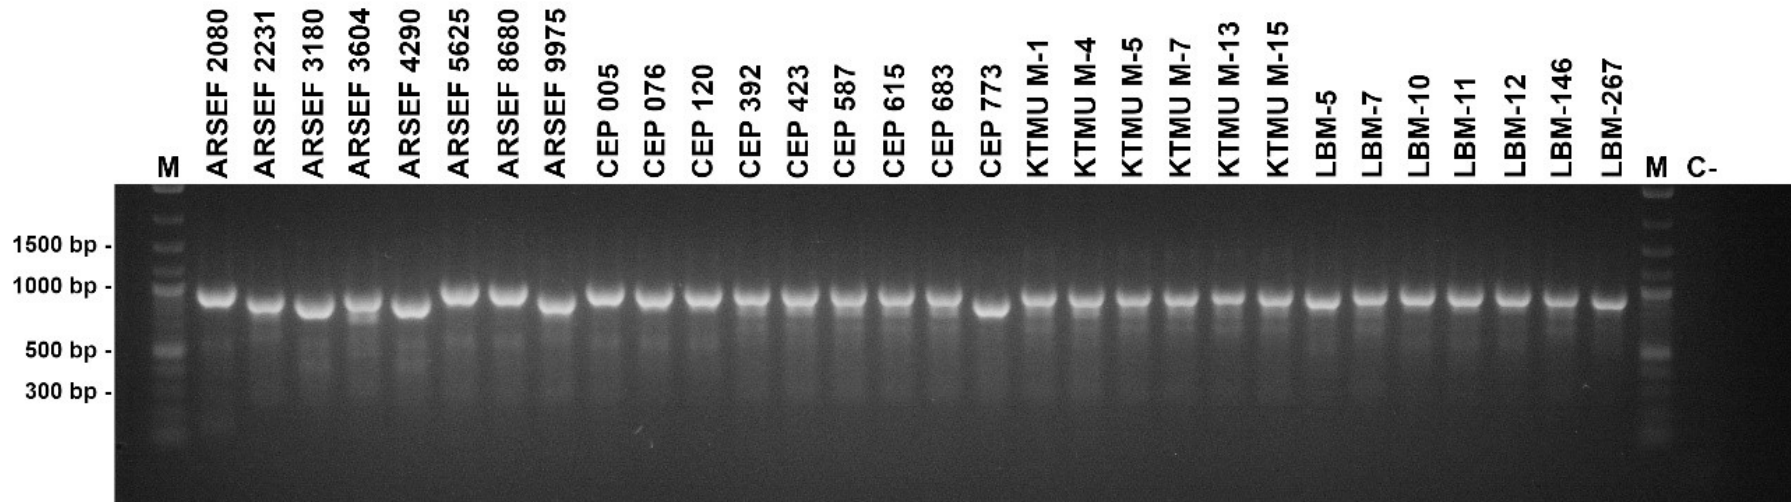

**Suppl. Figure S8.** Agarose gel electrophoresis of PCR reactions from template DNA of the validation strain set amplifying the rIGS-ID800 sequence with primer pair Migs1-F1 / Migs850-R1. The length of relevant signals in the size standard is indicated at the left margin. Lane labels on top of the picture indicate the *Metarhizium* strain or isolate; “M” denotes the size standard, “C-” the negative (no template) control.
